# Supplementary material for: Phosphorus(v) tetrapyrazinocorrolazines bearing axial aryloxy groups as pH-sensitive fluorophores and photosensitizers
Source: Royal Society of Chemistry journal article supplement (doi:10.1039/d2dt00307d), 2022-01-01
Supplement: d2dt00307d1.pdf [file d2dt00307d1.pdf]

## Supporting information

### Phosphorus(V) Tetrapyrazinocorrolazines Bearing Axial Aryloxy Groups as pH-sensitive Fluorophores and Photosensitizers

Dmitriy A. Lazovskiy,<sup>a</sup> Ivan A. Skvortsov,<sup>a</sup> Veronika Novakova<sup>b</sup> and Pavel A. Stuzhin<sup>\*a</sup>

<sup>a</sup> Institute of Macroheterocycles, Ivanovo State University of Chemistry and Technology, 153000 Ivanovo, Russia, e-mail: stuzhin@isuct.ru

<sup>b</sup> Faculty of Pharmacy in Hradec Kralove, Charles University, Hradec Kralove, 500 05 Czech Republic.

#### Content

#### I. Spectral characterization.....pages 3-6

Figure S1. LDI-TOF mass spectra of [TPyzCAP(OAr)<sub>2</sub>] (**2a-c**).

Figure S2. <sup>1</sup>H NMR spectrum of [TPyzCAP(OPh)<sub>2</sub>] (**2a**) in CDCl<sub>3</sub> in the solvent

Figure S3. <sup>31</sup>P NMR spectrum of [TPyzCAP(OPh)<sub>2</sub>] (**2a**) in CDCl<sub>3</sub>.

Figure S4. <sup>1</sup>H NMR spectrum of [TPyzCAP(OPhNMe<sub>2</sub>)<sub>2</sub>] (**2b**) in CDCl<sub>3</sub>

Figure S5. <sup>31</sup>P NMR spectrum of [TPyzCAP(OPhNMe<sub>2</sub>)<sub>2</sub>] (**2b**) in CDCl<sub>3</sub>.

Figure S6. <sup>1</sup>H NMR spectrum of [TPyzCAP(OPhOH)<sub>2</sub>] (**2c**) in CDCl<sub>3</sub>

Figure S7. <sup>31</sup>P NMR spectrum of [TPyzCAP(OPhOH)<sub>2</sub>] (**2c**) in CDCl<sub>3</sub>.

#### II. DFT calculations .....pages 7-21

Table S1. Cartesian coordinates of TPyzCAP(OH)<sub>2</sub> at B3LYP/cc-pVDZ level of theory

Table S2. Cartesian coordinates of TPyzCAP(OPh)<sub>2</sub> at B3LYP/cc-pVDZ level of theory

Table S3. Cartesian coordinates of TPyzCAP(OPhNMe<sub>2</sub>)<sub>2</sub> at B3LYP/cc-pVDZ level of theory

Table S4. Cartesian coordinates of TPyzCAP(OPhOH)<sub>2</sub> at B3LYP/cc-pVDZ level of theory

#### III. Electrochemical measurements.....page 22

Figure S8. Cyclic voltammogram of [TPyzCAP(OPh)<sub>2</sub>] in acetonitrile solution with 0.1M tbaClO<sub>4</sub> as supporting electrolyte. Scan rate – 50mV/s

Figure S9. Cyclic voltammogram of [TPyzCAP(OPhOH)<sub>2</sub>] in acetonitrile solution with 0.1M tbaClO<sub>4</sub> as supporting electrolyte. Scan rate – 50mV/s

Figure S10. Cyclic voltammogram of [TPyzCAP(OPhNMe<sub>2</sub>)<sub>2</sub>] in acetonitrile solution with 0.1M tbaClO<sub>4</sub> as supporting electrolyte. Scan rate – 50mV/s.

#### IV. TD DFT calculations .....pages 23-28

Table S5. Calculated composition of the lowest excited states and corresponding oscillator strength for [TPyzCAP(OH)<sub>2</sub>].

Table S6. Calculated composition of the lowest excited states and corresponding oscillator strength for [TPyzCAP(OPh)<sub>2</sub>].

Table S7. Calculated composition of the lowest excited states and corresponding oscillator strength for [TPyzCAP(OPhOH)<sub>2</sub>].

Table S8. Calculated composition of the lowest excited states and corresponding oscillator strength for [TPyzCAP(OPhNMe<sub>2</sub>)<sub>2</sub>].

Figure S11. Predicted (black) and experimental (red) absorption spectra of [TPyzCAP(OAr)<sub>2</sub>].

**V. Fluorescence measurements pages.....pages 29-30**

Figure S12. Dependence of fluorescence quantum yield from TFA concentration in CH<sub>2</sub>Cl<sub>2</sub>

Figure S13. Dependence of fluorescence quantum yield from DBU concentration in CH<sub>2</sub>Cl<sub>2</sub>.

Figure S14. Reversible changes of [TPyzCAP(OH)<sub>2</sub>] fluorescence quantum yield during consecutive titration with DBU and TFA in CH<sub>2</sub>Cl<sub>2</sub>.

Figure S15. Reversible changes of [TPyzCAP(OPhNMe<sub>2</sub>)<sub>2</sub>] fluorescence quantum yield during consecutive titration with TFA and DBU in CH<sub>2</sub>Cl<sub>2</sub>.

**VI. Singlet oxygen measurements.....page 31**

Figure S16. Spectral changes of DPBF solutions with photosensitizers in THF during irradiation. Photosensitizer is: A – TPyzCAP(OH)<sub>2</sub>; B – TPyzCAP(OPh)<sub>2</sub>; C – TPyzCAP(OPhOH)<sub>2</sub>; D- TPyzCAP(OPhNMe<sub>2</sub>)<sub>2</sub>

## I. Spectral characterization

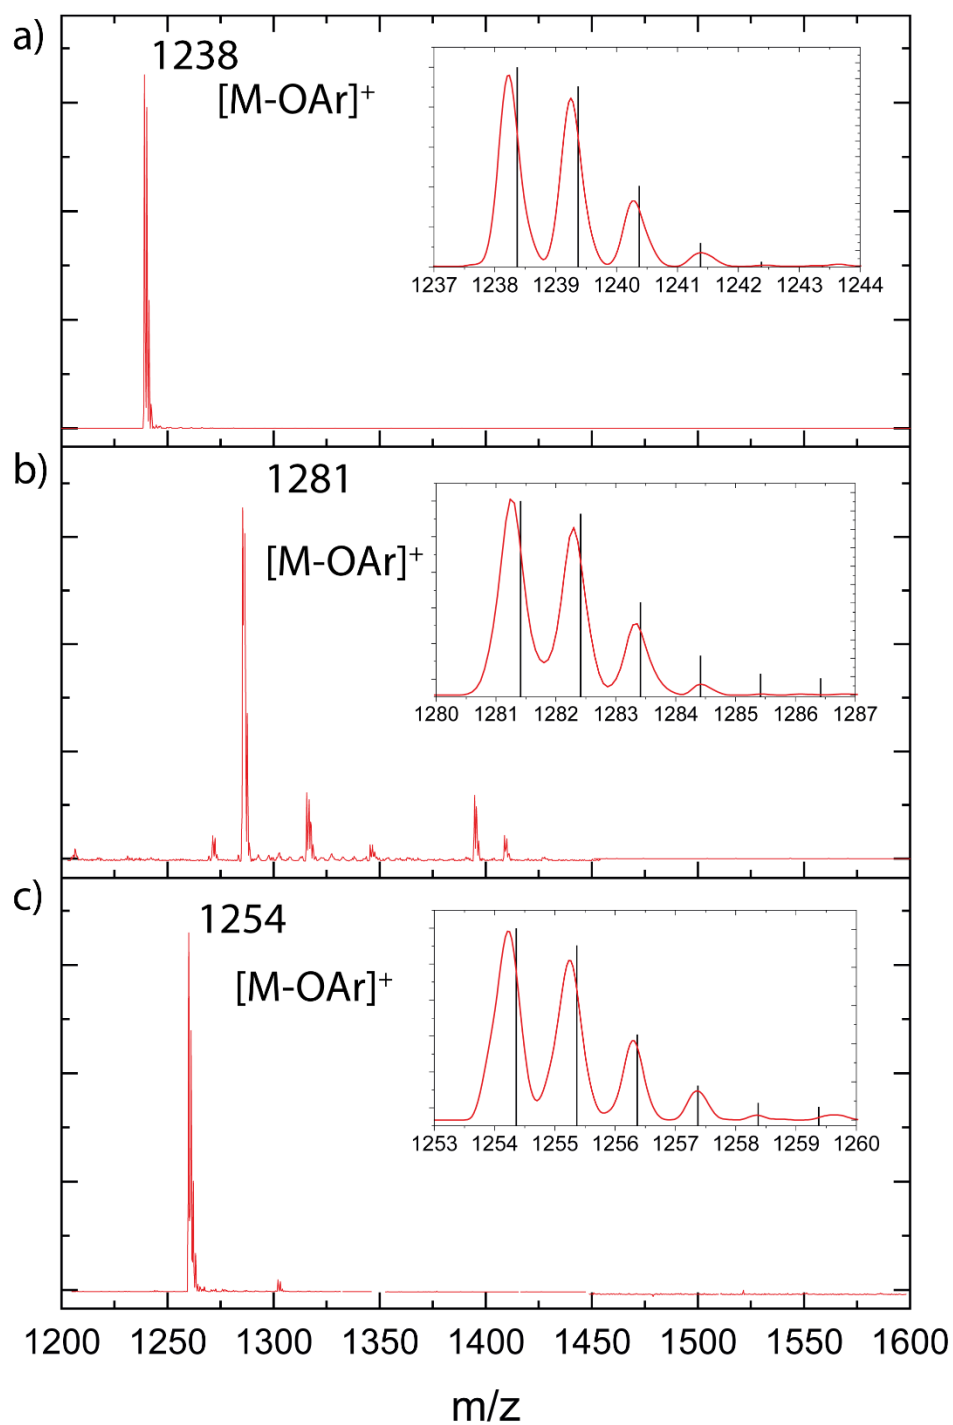

**Figure S1.** LDI-TOF mass spectra of  $[TPyzCAP(OAr)_2]$  (**2a-c**). Ar = phenyl (a), 4-dimethylaminophenyl (b), 4-hydroxyphenyl (c).

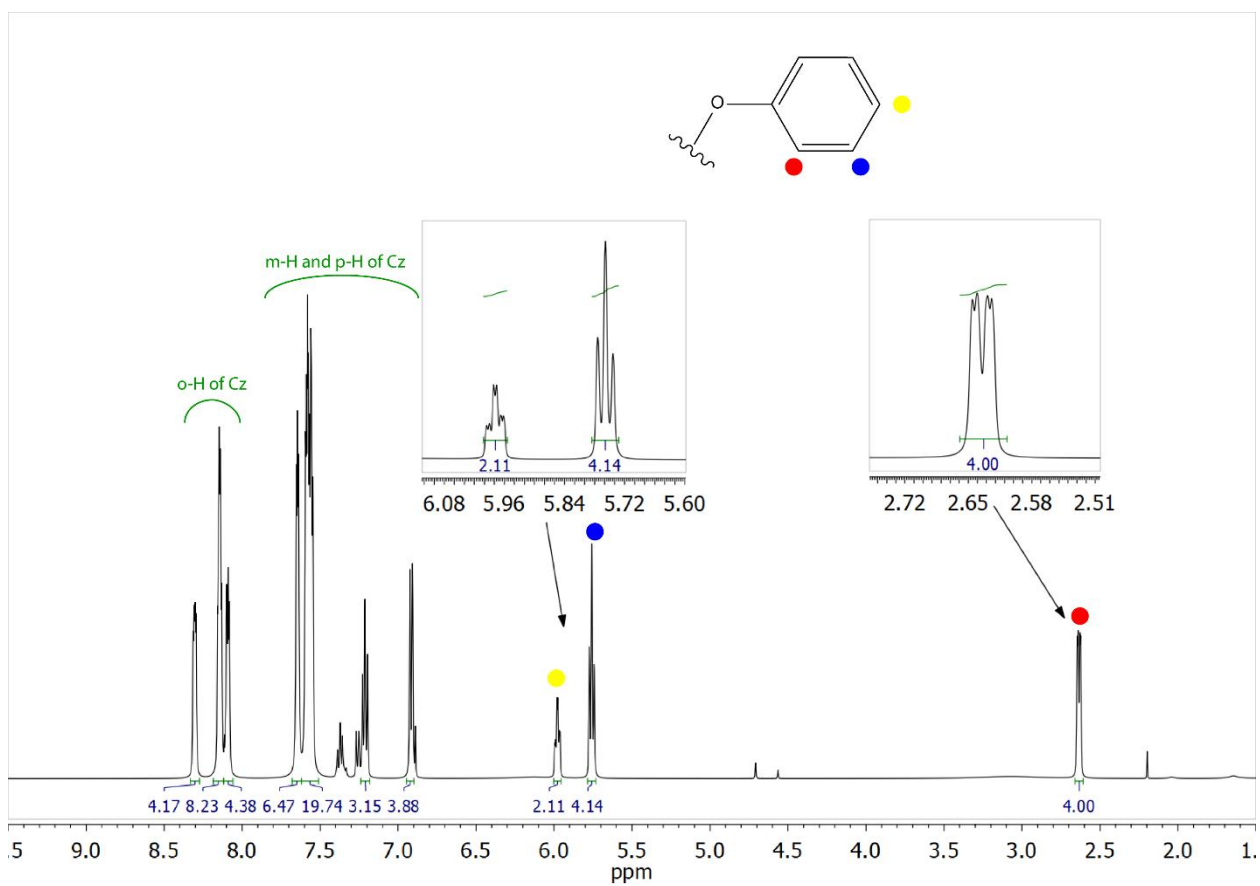

Figure S2.  $^1\text{H}$  NMR spectrum of  $[\text{TPyzCAP}(\text{OPh})_2]$  (**2a**) in  $\text{CDCl}_3$

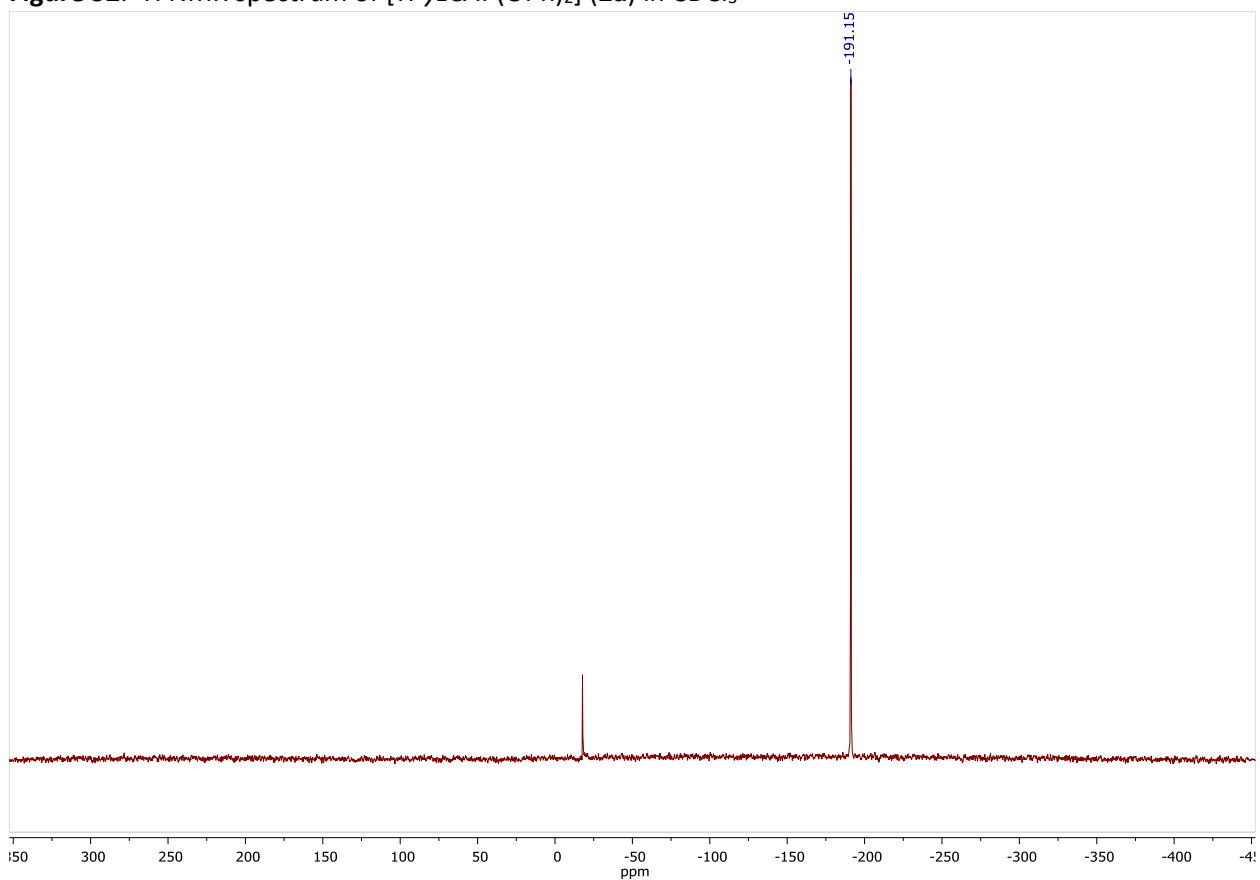

Figure S3.  $^{31}\text{P}$  NMR spectra of  $[\text{TPyzCAP}(\text{OPh})_2]$  (**2a**) in  $\text{CDCl}_3$ .

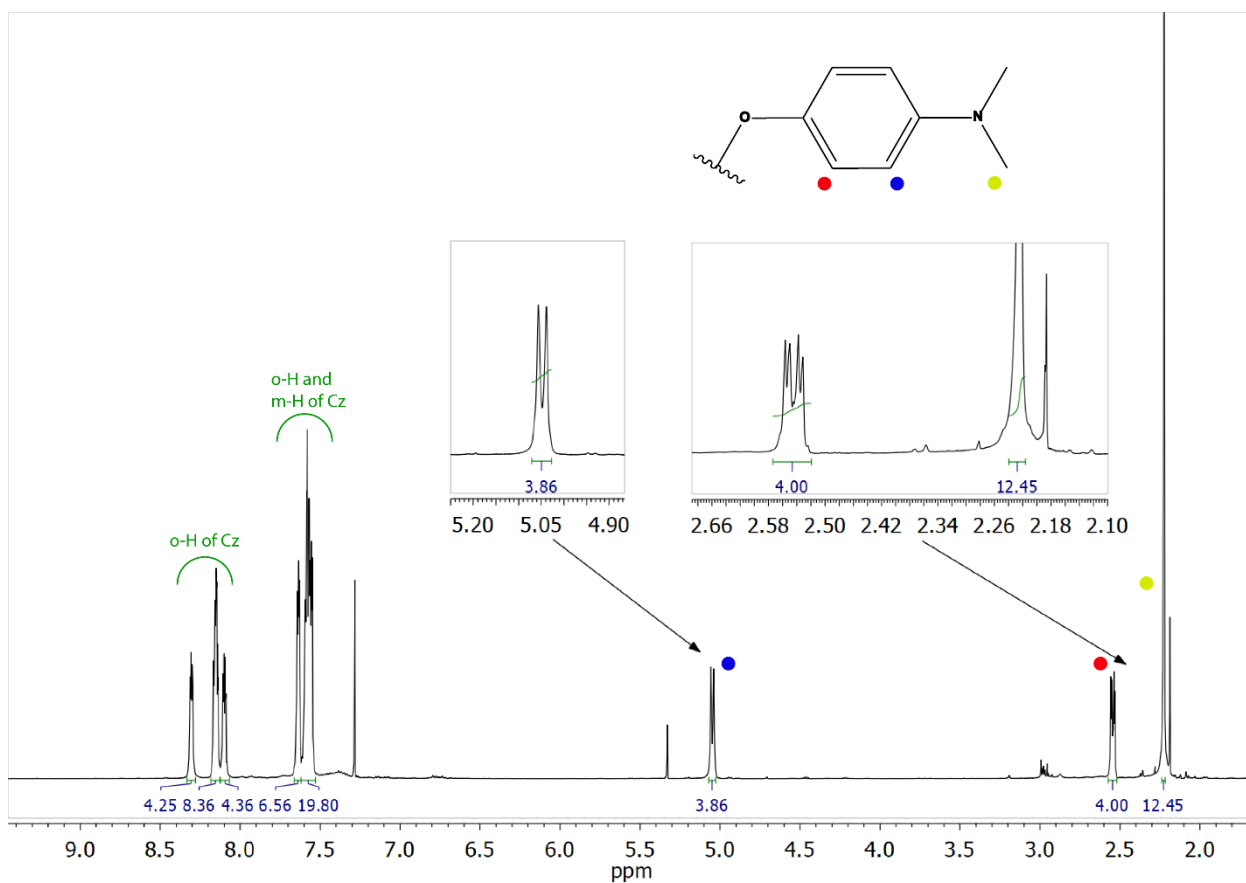

Figure S4.  $^1\text{H}$  NMR spectrum of  $[\text{TPyzCAP}(\text{OPhNMe}_2)_2]$  (**2b**) in  $\text{CDCl}_3$

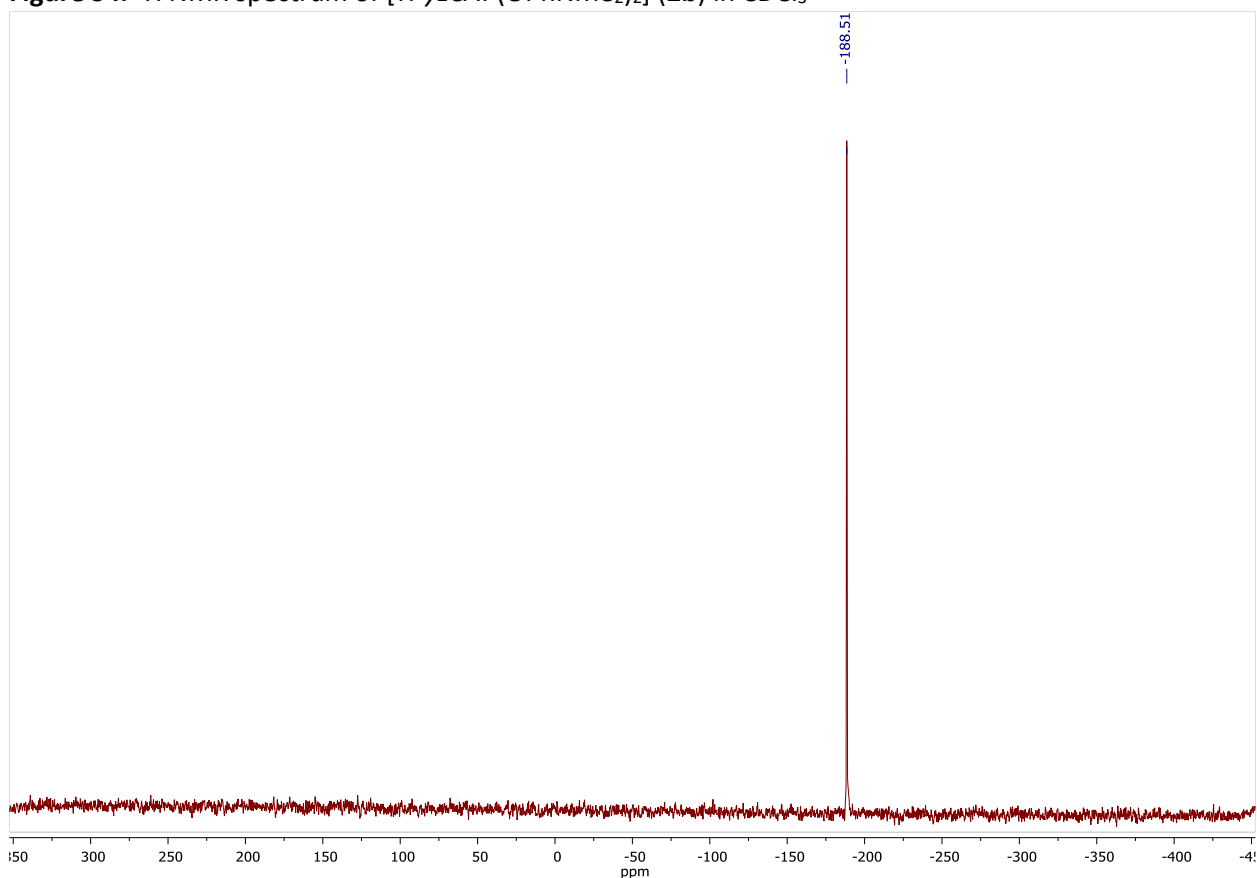

Figure S5.  $^{31}\text{P}$  NMR spectra of  $[\text{TPyzCAP}(\text{OPhNMe}_2)_2]$  (**2b**) in  $\text{CDCl}_3$ .

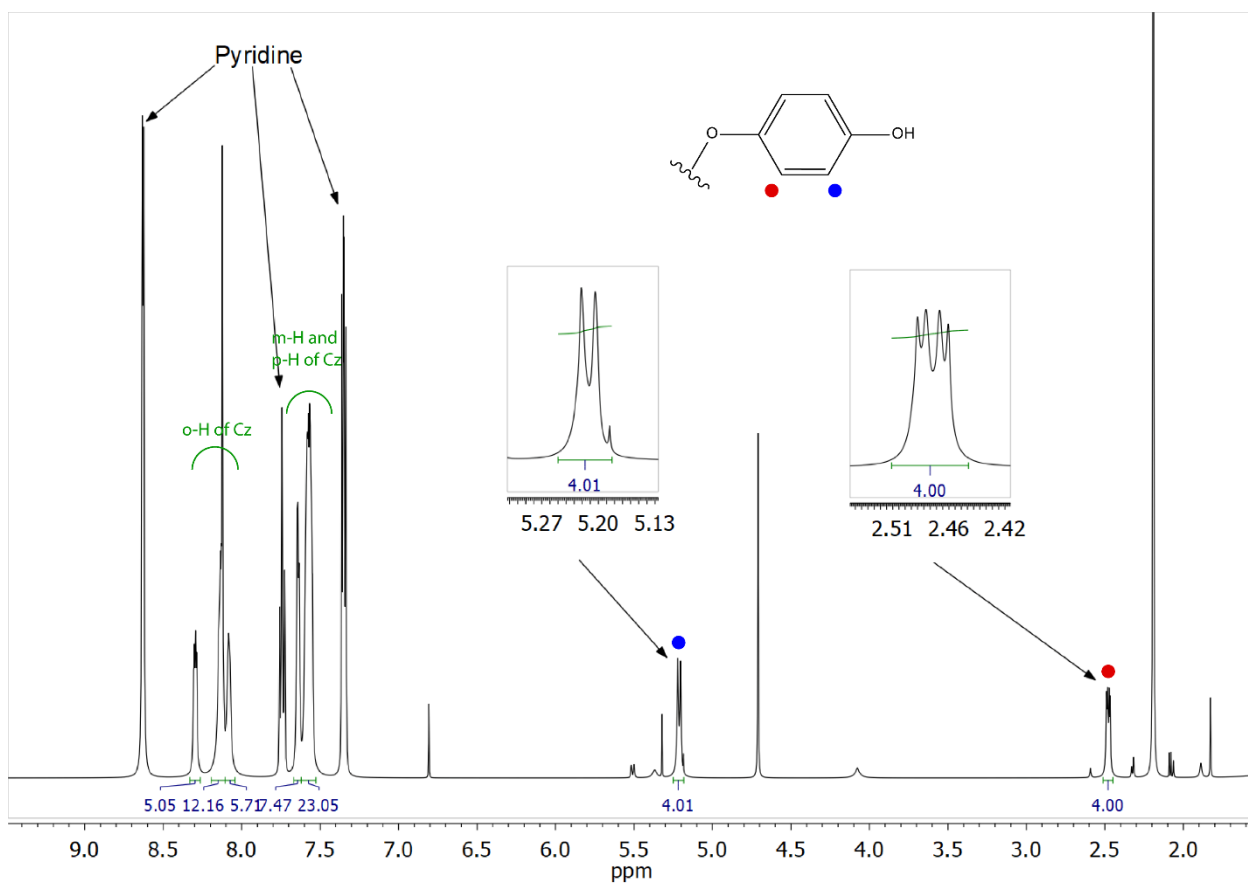

Figure S6.  $^1\text{H}$  NMR spectrum of  $[\text{TPyzCAP}(\text{OPhOH})_2]$  (**2c**) in  $\text{CDCl}_3$

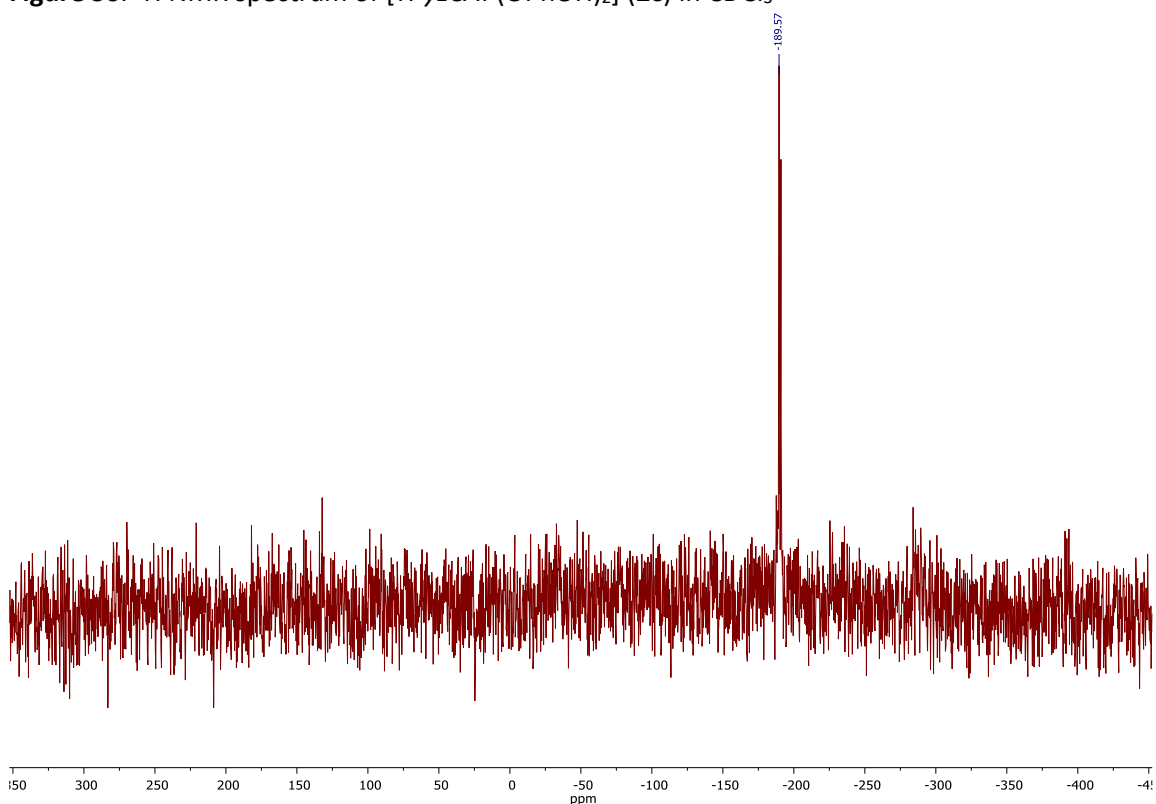

Figure S7.  $^{31}\text{P}$  NMR spectra of  $[\text{TPyzCAP}(\text{OPhOH})_2]$  (**2c**) in  $\text{CDCl}_3$ .

## II. DFT Calculations

Table S1. Cartesian coordinates of TPyzCAP(OH)<sub>2</sub> at B3LYP/cc-pVDZ level of theory:

|   |                   |                   |                   |
|---|-------------------|-------------------|-------------------|
| C | -2.35090794196888 | 2.65989752311006  | 0.22687104099568  |
| C | -1.10463815539405 | 3.34346813449046  | 0.21759221819201  |
| C | -0.09264179734503 | 2.38512161953451  | 0.57307902804273  |
| C | 1.28570990378913  | 2.27169612558713  | 0.74977647624637  |
| C | 3.00337198501601  | 0.87443182605268  | 1.34175347627922  |
| N | 3.60056896661618  | -0.22468612126339 | 1.78202963370732  |
| C | 2.87521290607832  | -1.30475267714308 | 2.03372076464481  |
| C | 3.38381349077329  | -2.54269582996315 | 2.58987931129150  |
| C | 2.31580116908487  | -3.45393916559232 | 2.68717486314830  |
| C | 1.12029471470368  | -2.79385488738096 | 2.21093367445765  |
| N | 1.49913924707663  | -1.50409695316857 | 1.82533689835738  |
| N | 1.65410941991308  | 0.99920401284882  | 1.13873871002494  |
| N | -0.74627712900605 | 1.18416378337332  | 0.79101942458644  |
| C | -2.09719146714351 | 1.26317006797125  | 0.54848261713899  |
| N | -2.93529688991941 | 0.23977061554314  | 0.60672567443468  |
| C | -2.48253932240738 | -0.95398444082630 | 0.96174638015763  |
| N | -0.07958197520026 | -3.33792437694923 | 2.12457639613520  |
| C | -1.13533833005280 | -2.66407656921065 | 1.70447796076035  |
| C | -2.45403118731050 | -3.21440425037598 | 1.45629565824863  |
| C | -3.26836272441577 | -2.17165466539258 | 0.97658229798145  |
| N | -1.19527593767460 | -1.30688807273604 | 1.38605201950191  |
| C | 2.49761645779699  | 3.04362962130642  | 0.66027181573153  |
| C | 3.57101780281690  | 2.17174822728059  | 0.99135218061706  |
| N | -3.50952813999905 | 3.30678739703279  | 0.07627012153630  |
| C | -3.43228952556088 | 4.62919060413858  | -0.12549240466717 |
| C | -2.15479157072349 | 5.28728797696735  | -0.31571477282733 |
| N | -1.00467400995150 | 4.63739129509949  | -0.09783678676015 |
| N | 2.68950905996871  | 4.33302821120347  | 0.36889833976106  |
| C | 3.96277044472130  | 4.74626791747932  | 0.32809056800253  |
| C | 5.06130169426149  | 3.81166347895720  | 0.47684206398989  |
| N | 4.61938527377222  | -2.83284101649797 | 3.01350162973134  |
| C | 4.79488134236733  | -4.06689216962883 | 3.50083577893492  |
| C | 3.72230286032424  | -5.04648403221515 | 3.47592402218475  |
| N | 2.48053486410657  | -4.71439617335477 | 3.10781145126767  |
| N | -2.90950424137449 | -4.46208279036056 | 1.62081182263932  |
| C | -4.17041250537441 | -4.67841866911866 | 1.22430211118885  |
| C | -4.94351128283036 | -3.64080473587350 | 0.56808612245982  |
| N | -4.50630061054036 | -2.37702138033582 | 0.51350833713540  |
| C | -4.73888433924092 | 5.34046998708516  | -0.03351303300045 |

|   |                   |                   |                   |
|---|-------------------|-------------------|-------------------|
| N | 4.84557114568296  | 2.54760028857158  | 0.87079870005752  |
| C | -5.89632493616414 | 4.72759810691004  | -0.54626025169542 |
| C | -7.14893832127258 | 5.31836469168470  | -0.37322595910843 |
| C | -7.26966867837979 | 6.51786799450931  | 0.33693769217108  |
| C | -6.12626026581431 | 7.12839853521593  | 0.86175435315843  |
| C | -4.86945231144382 | 6.55089083785294  | 0.67127565291374  |
| H | -3.98783062571724 | 7.03162651503753  | 1.09750752909190  |
| H | -8.25116314497571 | 6.97297374409864  | 0.49206946718306  |
| H | -6.21371419863023 | 8.05759882280128  | 1.42954585207358  |
| H | -5.79911758949179 | 3.77361840151920  | -1.06600646487168 |
| H | -8.03586855825777 | 4.83232293192431  | -0.78700155447075 |
| C | -1.98426855954655 | 6.69049228394417  | -0.78778514366531 |
| C | 4.13270267019267  | 6.21635558835098  | 0.15024992603424  |
| C | 6.48042636224772  | 4.13102980071710  | 0.15017507798923  |
| C | 6.14665321919219  | -4.32431446991389 | 4.07580885054663  |
| C | 3.90793075752711  | -6.48693360100813 | 3.81315468883985  |
| C | -4.70738797478716 | -6.03544425544386 | 1.52482545008930  |
| C | -6.21763920671595 | -3.88569678473377 | -0.16754231888392 |
| C | -0.88331739068609 | 7.42986439630690  | -0.31540559988018 |
| C | -0.63848441273655 | 8.72007226616794  | -0.78737271976185 |
| C | -1.47354244729631 | 9.28292597121158  | -1.75917362477534 |
| C | -2.56299927319639 | 8.55157762407148  | -2.24453253500067 |
| C | -2.82232980991097 | 7.26728658580675  | -1.75958636567344 |
| H | -0.21498243169719 | 6.96871905979918  | 0.41263916162473  |
| H | 0.21378989455715  | 9.28247953809830  | -0.39826312844322 |
| H | -1.27011897951613 | 10.28557134756906 | -2.14416618108791 |
| H | -3.21442439120377 | 8.98066319273451  | -3.00946478761251 |
| H | -3.66807031603957 | 6.70362611964270  | -2.15610374058882 |
| C | 3.26604062792590  | 6.90962483219334  | -0.71470524458579 |
| C | 5.09627234562044  | 6.94426405859432  | 0.87161259608850  |
| C | 5.21658151564485  | 8.32418350279930  | 0.70069992269252  |
| C | 4.38055473654235  | 8.99823968246794  | -0.19597379226394 |
| C | 3.39992727629863  | 8.28746003349313  | -0.89689800973440 |
| H | 5.75646292600601  | 6.42730861060533  | 1.56966629156012  |
| H | 5.96777455278976  | 8.87649257791247  | 1.26992204160848  |
| H | 4.49537985160382  | 10.07438494806912 | -0.34909660122927 |
| C | 7.51204336575086  | 3.48359422124600  | 0.85616920264874  |
| C | 8.85017763318372  | 3.72559129818542  | 0.53990701416984  |
| C | 9.18339356022778  | 4.60454849883821  | -0.49715647161474 |
| H | 7.24434768007331  | 2.78195947905942  | 1.64715110775617  |
| H | 9.63711714533238  | 3.22024082198258  | 1.10486212923815  |
| C | 8.16557380541584  | 5.22852625213956  | -1.22533025024529 |



|   |                   |                    |                   |
|---|-------------------|--------------------|-------------------|
| H | 10.22965107672908 | 4.79841155661501   | -0.74751807405386 |
| C | 6.82724574737677  | 4.99454274662838   | -0.90642461374096 |
| H | 8.41397846324461  | 5.89964730082908   | -2.05083467346189 |
| H | 6.04832120062592  | 5.48130681236774   | -1.49344663874530 |
| H | 2.73293349065207  | 8.80763122555293   | -1.58844556482168 |
| H | 2.49104759549381  | 6.35328569220188   | -1.24380780812208 |
| C | 7.26838129630788  | -3.73497265398158  | 3.46344828744150  |
| C | 6.33785062061262  | -5.08393276309152  | 5.24461385347561  |
| C | 7.62006841711329  | -5.28036383503129  | 5.76050625743963  |
| C | 8.55060245589733  | -3.94285868806487  | 3.97444676622847  |
| C | 8.73248440129365  | -4.72438683534257  | 5.12074267185380  |
| H | 5.48261368203255  | -5.52418050941238  | 5.75857712563312  |
| H | 7.75088084047410  | -5.87322017612588  | 6.66878923426217  |
| H | 9.73467562896543  | -4.89807239632336  | 5.52100124936291  |
| H | 7.11494125265501  | -3.11081112328370  | 2.58237280849532  |
| H | 9.40982200788990  | -3.48772684541608  | 3.47575727001775  |
| C | 5.01007219420325  | -7.22066910746436  | 3.33931469927424  |
| C | 2.92494281464972  | -7.14900698753210  | 4.56974679859530  |
| C | 3.06645854817068  | -8.50108111484562  | 4.88849304762987  |
| C | 4.17829854388319  | -9.21729179617028  | 4.43177648789222  |
| C | 5.13940353985132  | -8.57711357478338  | 3.64224046294202  |
| H | 2.05217849558378  | -6.58772899872968  | 4.90660962063673  |
| H | 2.30312972923481  | -8.99836261718539  | 5.49153830085162  |
| H | 4.29404955086271  | -10.27348254316997 | 4.68789482243722  |
| H | 5.76719589016983  | -6.72860766370125  | 2.72712022021279  |
| H | 5.99621129068165  | -9.13663571619926  | 3.25977680300779  |
| C | -6.03068173558564 | -6.23126728009084  | 1.96027866960139  |
| C | -3.85617755218347 | -7.15103184648595  | 1.42722711715484  |
| C | -6.49621631271787 | -7.51270911470325  | 2.26003583311895  |
| C | -4.32855437962992 | -8.43320469393179  | 1.71377638395448  |
| C | -5.65213928729203 | -8.61973696932134  | 2.12619768315829  |
| H | -6.69703545690895 | -5.37576420307761  | 2.07966467661258  |
| H | -7.52408979735491 | -7.64691015508259  | 2.60548747579541  |
| H | -6.02455481259628 | -9.62160263563035  | 2.35435082088478  |
| H | -2.82085408138768 | -6.99461878566810  | 1.12053257910928  |
| H | -3.65883015745555 | -9.29082373998584  | 1.61487521620557  |
| C | -7.24687284284368 | -2.92879585164849  | -0.10975058474830 |
| C | -6.37227284734512 | -4.99708020894937  | -1.01647205179666 |
| C | -8.41520650929956 | -3.09629627344848  | -0.85605543508027 |
| C | -7.53433796336693 | -5.15330074898340  | -1.77504798613039 |
| C | -8.56300298065633 | -4.20905686136633  | -1.69179118459794 |
| H | -7.11064585588028 | -2.04740286065483  | 0.51838690914904  |

|   |                   |                   |                   |
|---|-------------------|-------------------|-------------------|
| H | -9.21010219893570 | -2.34901809900108 | -0.79115686390025 |
| H | -9.47393754452638 | -4.33941864430695 | -2.28110083750685 |
| H | -5.57090151894306 | -5.73299961792851 | -1.10145941214668 |
| H | -7.63516114705421 | -6.01515623296775 | -2.43889996577561 |
| P | 0.29656804389148  | -0.21960024474395 | 1.30266302462865  |
| O | 0.14844856484520  | 0.16871753941302  | 2.95638858120318  |
| H | -0.72230752293134 | 0.55376086445622  | 3.13921135470783  |
| O | 0.44243700209446  | -0.65378287934735 | -0.34068631831982 |
| H | 1.28708035132009  | -1.10188364359241 | -0.49741095462741 |

**Table S2.** Cartesian coordinates of TPyzCAP(OPh)<sub>2</sub> at B3LYP/cc-pVDZ level of theory:

|   |                   |                   |                   |
|---|-------------------|-------------------|-------------------|
| C | -2.54511007480660 | 2.15379568571405  | 0.18353276053760  |
| C | -1.61858957196274 | 3.22544941279462  | 0.07922878101292  |
| C | -0.30205222396535 | 2.72174167188643  | 0.43622519584132  |
| N | 0.85771687793744  | 3.35493208820809  | 0.47640839806553  |
| C | 1.94732861482879  | 2.68368763006513  | 0.80984295784035  |
| C | 3.40617481164348  | 1.00820128751665  | 1.40792792418353  |
| N | 3.90114377875239  | -0.17164745607079 | 1.73120303295016  |
| C | 3.14357873530105  | -1.24781197489429 | 1.82876261487056  |
| C | 3.59860440449425  | -2.56341619184179 | 2.22010415680054  |
| C | 2.48737921230334  | -3.42343359960563 | 2.21138373885915  |
| C | 1.32069978416526  | -2.65161321048571 | 1.83563721465034  |
| N | 1.77020991911936  | -1.34353318346980 | 1.59418164082208  |
| N | 2.07075038721815  | 1.32798991538607  | 1.15386867817161  |
| N | -0.48277787089220 | 1.39393604098605  | 0.73275279514141  |
| C | -1.79682462618872 | 0.98868401660610  | 0.57539833793230  |
| C | -1.95168830267370 | -0.37552952390881 | 0.80738765137215  |
| N | 0.09093924671150  | -3.13087380618337 | 1.75152776857308  |
| C | -0.89425628549363 | -2.32013075435714 | 1.40541261479498  |
| C | -2.31543601870887 | -2.59697816175168 | 1.27022503313739  |
| C | -2.96492356288786 | -1.39469660219609 | 0.88232481273019  |
| N | -0.74703150803293 | -0.98953610972558 | 1.10312491071722  |
| C | 3.27887098224141  | 3.24884020724450  | 0.88491552591730  |
| C | 4.17207686140698  | 2.22281645713306  | 1.23704647608587  |
| N | -3.85641277114919 | 2.32013301258400  | -0.01762208459304 |
| C | -4.24559366695210 | 3.55013445794594  | -0.37667430879005 |
| C | -3.28132563817335 | 4.60428508860956  | -0.62292046837903 |
| N | -1.98195048387420 | 4.43845918151023  | -0.34222284665215 |
| N | 3.66851896483384  | 4.51770668405108  | 0.72199420931459  |
| C | 4.97908027664050  | 4.74788758614347  | 0.86528536444015  |
| C | 5.91721421766690  | 3.66079091391139  | 1.08077015323956  |

|   |                   |                   |                   |
|---|-------------------|-------------------|-------------------|
| N | 4.81713404538608  | -2.96377551150992 | 2.60158119007572  |
| C | 4.92820830699091  | -4.25575515555048 | 2.93138583519959  |
| C | 3.81286279538980  | -5.17272150250184 | 2.77819712379868  |
| N | 2.58860712510401  | -4.73272545929562 | 2.46415639851004  |
| N | -2.99099666156104 | -3.72348301096944 | 1.50617417369974  |
| C | -4.31610105823149 | -3.67139029958772 | 1.31602920716002  |
| C | -4.95411700164865 | -2.48461198047930 | 0.78106966626038  |
| N | -4.27354018956972 | -1.34364340786380 | 0.61302654009375  |
| C | -5.72334200253195 | 3.73281596986594  | -0.45149927736001 |
| N | 5.49440066710283  | 2.41283372806386  | 1.31354931375510  |
| C | -6.51630150944387 | 2.68952843549932  | -0.96354185621636 |
| C | -7.90649844943813 | 2.81025452219727  | -1.00626870308159 |
| C | -8.52868146266845 | 3.96231569915171  | -0.51313135783961 |
| C | -7.75011963906871 | 4.99222274966475  | 0.02492459770469  |
| C | -6.35841380465243 | 4.88277959639331  | 0.05104452617838  |
| H | -5.76318096510183 | 5.69162197294403  | 0.47749479621582  |
| H | -9.61710166113047 | 4.05527372555087  | -0.54247671865164 |
| H | -8.22824864486306 | 5.88772414380435  | 0.42887272020237  |
| H | -6.02777627440930 | 1.78189227687886  | -1.32098631315269 |
| H | -8.50541293440147 | 1.99707876223426  | -1.42330288795068 |
| C | -3.61790967431549 | 5.91997590357807  | -1.23719611092666 |
| C | 5.36153367291197  | 6.18841552527850  | 0.83258950855140  |
| C | 7.39924763234450  | 3.81033194534086  | 1.01680055384338  |
| C | 6.25239864463889  | -4.63775512221252 | 3.50020960998851  |
| C | 3.92480197291660  | -6.65409985506230 | 2.90260889034565  |
| C | -5.05003774673568 | -4.89739099086077 | 1.74021512747840  |
| C | -6.37585154055593 | -2.42665424087366 | 0.33609324775700  |
| C | -2.95327178529984 | 7.07508007795914  | -0.78617215979522 |
| C | -3.20471784330949 | 8.31475462487409  | -1.37580884034048 |
| C | -4.10477287081233 | 8.41718111708303  | -2.44188173029880 |
| C | -4.74979148077111 | 7.27002415129382  | -2.91539291927730 |
| C | -4.51355926066651 | 6.03139868657864  | -2.31607240577855 |
| H | -2.23223114527842 | 6.98328150213935  | 0.02736131400275  |
| H | -2.68923298933263 | 9.20431747566502  | -1.00581321334474 |
| H | -4.29716133455872 | 9.38673382552724  | -2.90773526271436 |
| H | -5.43958567200836 | 7.33763945580982  | -3.75998459670373 |
| H | -5.01680495162242 | 5.14315565245753  | -2.70090532059049 |
| C | 4.69579411736696  | 7.05280885927024  | -0.05563762733148 |
| C | 6.30447972862053  | 6.72968561998657  | 1.72499383851254  |
| C | 6.58494226457970  | 8.09740212312210  | 1.71590641829737  |
| C | 5.93740637437478  | 8.94421273532153  | 0.81048415977260  |
| C | 4.99090984143184  | 8.41672477576332  | -0.07442614992907 |

|   |                   |                    |                   |
|---|-------------------|--------------------|-------------------|
| H | 6.81155194305130  | 6.08158407252506   | 2.44134983493000  |
| H | 7.31212156539692  | 8.50346429554485   | 2.42311690798894  |
| H | 6.16457573954854  | 10.01305586479337  | 0.79971149149576  |
| C | 8.20101299757086  | 3.06685012669626   | 1.90197071594694  |
| C | 9.59294737001342  | 3.14170794840173   | 1.83298202669525  |
| C | 10.20730032606700 | 3.94068227773834   | 0.86275702120097  |
| H | 7.71518303557545  | 2.42477407593166   | 2.63809966665940  |
| H | 10.20120494890437 | 2.56733836032741   | 2.53596574516414  |
| C | 9.41890477295463  | 4.66248138978004   | -0.03925235320961 |
| H | 11.29716937192140 | 3.99507058452026   | 0.80478737610474  |
| C | 8.02614071068571  | 4.60316413747332   | 0.03869890367690  |
| H | 9.89016013703904  | 5.27446484674086   | -0.81202773609606 |
| H | 7.42293202782541  | 5.16525661157113   | -0.67580780144320 |
| H | 4.47366380574990  | 9.07243103862753   | -0.77909413869572 |
| H | 3.93930830982388  | 6.63885541688500   | -0.72383737884141 |
| C | 7.41882104208261  | -4.05888090464977  | 2.96780581230890  |
| C | 6.36681112759028  | -5.49077961462308  | 4.61265430000612  |
| C | 7.61803284072552  | -5.76951962369150  | 5.16594386590917  |
| C | 8.66989185152270  | -4.35304738922091  | 3.51199342652217  |
| C | 8.77446104390523  | -5.21041492457381  | 4.61249967485035  |
| H | 5.47201091585328  | -5.92752494903174  | 5.05866364914392  |
| H | 7.68845904585464  | -6.42544637723907  | 6.03690953434274  |
| H | 9.75334909848609  | -5.43649549944109  | 5.04238095153264  |
| H | 7.32704296787061  | -3.36984454143455  | 2.12698271230718  |
| H | 9.56733067949215  | -3.90465525304223  | 3.07884875847505  |
| C | 5.01879828834986  | -7.36581205140303  | 2.37811832548472  |
| C | 2.86370336455638  | -7.37369813191784  | 3.48196712344843  |
| C | 2.91191162466136  | -8.76595632122245  | 3.56570047763726  |
| C | 4.00884741368670  | -9.46438905193388  | 3.04987477629480  |
| C | 5.05621762285917  | -8.75978032486459  | 2.44759168619512  |
| H | 1.99938740128872  | -6.82410300561811  | 3.85748309802330  |
| H | 2.08505278535791  | -9.30892112855331  | 4.02996528904057  |
| H | 4.04427284977855  | -10.55490626820766 | 3.11041023130222  |
| H | 5.83917564412540  | -6.82912809590603  | 1.89924891630212  |
| H | 5.90830125724026  | -9.29803741500262  | 2.02563197603538  |
| C | -6.26986535075832 | -4.83193694387864  | 2.43758627924887  |
| C | -4.46347672989040 | -6.15668494183053  | 1.51759555070147  |
| C | -6.89346959346908 | -5.99829517576952  | 2.88468281256002  |
| C | -5.09795214128794 | -7.32194626553308  | 1.95030348946785  |
| C | -6.31589777525605 | -7.24732220028362  | 2.63450999469724  |
| H | -6.72715471526921 | -3.86372024846654  | 2.64672966732194  |
| H | -7.83478518082426 | -5.92947152376040  | 3.43506211602644  |

|   |                    |                   |                   |
|---|--------------------|-------------------|-------------------|
| H | -6.80980870303609  | -8.15922424050665 | 2.97882592906840  |
| H | -3.50025553529345  | -6.20565446949214 | 1.00771560051698  |
| H | -4.63497913834932  | -8.29300522711392 | 1.75887831356455  |
| C | -7.11894651973400  | -1.25549975746426 | 0.57187063962276  |
| C | -6.97389642837221  | -3.47483470060850 | -0.38636282403238 |
| C | -8.43882990906162  | -1.15139616084215 | 0.12894031641849  |
| C | -8.28765465965958  | -3.35991501130713 | -0.84496930448102 |
| C | -9.02855116924704  | -2.20343749849446 | -0.58024100015236 |
| H | -6.64534498070956  | -0.42737124170537 | 1.10113086502109  |
| H | -9.00654367449188  | -0.24109126906161 | 0.33613300413191  |
| H | -10.06025924104314 | -2.12058090798405 | -0.93076689495920 |
| H | -6.40558614868824  | -4.38058164158956 | -0.60325986186988 |
| H | -8.73397270754266  | -4.17915228185126 | -1.41361516984136 |
| P | 0.71720656960240   | 0.09171561137100  | 1.15743192804552  |
| O | 0.46021634418059   | 0.26174224953671  | 2.87244822693747  |
| C | 0.36111549549461   | 1.41423527639119  | 3.62279813551062  |
| O | 1.04440624951389   | -0.08426106145729 | -0.54489598479802 |
| C | 1.03575223224200   | -1.22868511189183 | -1.31388688889312 |
| C | -0.13739563240064  | -1.63374926496355 | -1.96588306941943 |
| C | 2.23316032578305   | -1.92460319964571 | -1.53518425289087 |
| C | -0.11344065478705  | -2.74286651100566 | -2.81579900760785 |
| C | 2.24693784836151   | -3.03228084455746 | -2.38652814382894 |
| C | 1.07463307622250   | -3.44998127898295 | -3.02465300596477 |
| C | 1.49916837698177   | 1.92251220069376  | 4.26575970076150  |
| C | -0.88799186892255  | 2.01317517626596  | 3.83839875088652  |
| C | 1.38713896562756   | 3.03730898138430  | 5.10042593238304  |
| C | -0.98994799802773  | 3.12771469574957  | 4.67532582642376  |
| C | 0.14558057807262   | 3.64813748879821  | 5.30378188344153  |
| H | -1.05568755421861  | -1.06309490424768 | -1.81859817924031 |
| H | 3.14872296529234   | -1.57768893023959 | -1.05327284703379 |
| H | -1.03137172281555  | -3.05161798690332 | -3.32208650464655 |
| H | 3.18382631851382   | -3.56894391823187 | -2.55476836347558 |
| H | 1.08937536803979   | -4.31631678378557 | -3.68969399640609 |
| H | 2.45977589185466   | 1.42512667016561  | 4.12183688800705  |
| H | -1.77430668463013  | 1.58770546862797  | 3.36515172067198  |
| H | 2.27812885658840   | 3.42713745380290  | 5.59864985391315  |
| H | -1.96726327152684  | 3.58806258135175  | 4.84024710017821  |
| H | 0.06188319485118   | 4.51934760700147  | 5.95725156156560  |

**Table S3.** Cartesian coordinates of TPyzCAP(OPhOH)<sub>2</sub> at B3LYP/cc-pVDZ level of theory:

|   |                   |                  |                  |
|---|-------------------|------------------|------------------|
| C | -2.57189201082916 | 2.17798293003830 | 0.31014683602189 |
| C | -1.66512868756006 | 3.27232610094736 | 0.30451429534804 |

|   |                   |                   |                   |
|---|-------------------|-------------------|-------------------|
| C | -0.34563905922234 | 2.76752663212057  | 0.65592553388300  |
| N | 0.81166096056611  | 3.40580241904853  | 0.71030116965552  |
| C | 1.91163528269960  | 2.72651795617655  | 0.99298737276727  |
| C | 3.37923756791477  | 1.03309977957742  | 1.51448856284308  |
| N | 3.87823984340384  | -0.14946139340649 | 1.82488839592886  |
| C | 3.12140985353966  | -1.22563216946514 | 1.93160456983400  |
| C | 3.57061139509215  | -2.53255561943981 | 2.35925049207658  |
| C | 2.46117042569228  | -3.39578439313936 | 2.34138677642595  |
| C | 1.30354339708905  | -2.63569707177621 | 1.91265611323912  |
| N | 1.75564674140705  | -1.32799425354468 | 1.66773570867560  |
| N | 2.03723823983713  | 1.36940002691579  | 1.33327414036197  |
| N | -0.51348637537307 | 1.42389341612264  | 0.88036906399459  |
| C | -1.81296506511284 | 1.00582310944497  | 0.65536017643178  |
| C | -1.95130866853980 | -0.37122877929724 | 0.80786829524842  |
| N | 0.08048523357457  | -3.12280837632561 | 1.78491738045618  |
| C | -0.89926421049252 | -2.31931992000607 | 1.40404438322713  |
| C | -2.31084890852156 | -2.60828614349601 | 1.19860429366234  |
| C | -2.95176493172667 | -1.40423897459229 | 0.80030286659935  |
| N | -0.75365505249992 | -0.98196792568316 | 1.13149494945888  |
| C | 3.25525650178686  | 3.26979409144924  | 0.96903540769392  |
| C | 4.15181516400703  | 2.23139540578374  | 1.27489658650821  |
| N | -3.87968864464490 | 2.32885462606315  | 0.06998136283718  |
| C | -4.28279804091435 | 3.57425929203358  | -0.21053420768871 |
| C | -3.34050930199335 | 4.66873244963977  | -0.33075112322988 |
| N | -2.04420016753345 | 4.50731537810407  | -0.03213893737411 |
| N | 3.66529347999071  | 4.51666953938271  | 0.70716813443252  |
| C | 4.99065934020289  | 4.70527968164066  | 0.69952274084114  |
| C | 5.91569963303894  | 3.60170351207275  | 0.88260507371599  |
| N | 4.77954898393405  | -2.91818981738573 | 2.78399240164532  |
| C | 4.88451005725642  | -4.19952733546156 | 3.15589226098975  |
| C | 3.77217245407094  | -5.12096236196448 | 3.01021079538451  |
| N | 2.55713135950971  | -4.69631601947810 | 2.64283970794307  |
| N | -2.99426897948311 | -3.74061686098610 | 1.38447988289010  |
| C | -4.30774089249023 | -3.69041265698031 | 1.12377398666403  |
| C | -4.92217231256569 | -2.50687484402483 | 0.55465754236342  |
| N | -4.23827094039232 | -1.36059417814848 | 0.44619793493249  |
| C | -5.75973096995931 | 3.73620217401058  | -0.34376023351561 |
| N | 5.47908087268585  | 2.38164928111287  | 1.21848073147546  |
| C | -6.49434628410629 | 2.79244206997721  | -1.08289189429757 |
| C | -7.87925712550896 | 2.91856863412909  | -1.21386073158927 |
| C | -8.55284537780497 | 3.97004939861081  | -0.58222848202474 |
| C | -7.83465477778498 | 4.88889196672926  | 0.19044525214038  |

|   |                   |                   |                   |
|---|-------------------|-------------------|-------------------|
| C | -6.44776047786125 | 4.77858725564485  | 0.30306479092388  |
| H | -5.89420998841422 | 5.50514310288633  | 0.89985017407685  |
| H | -9.63541611279832 | 4.07344084735181  | -0.69113402124493 |
| H | -8.35742151799974 | 5.69900461029126  | 0.70415102815972  |
| H | -5.96565555995484 | 1.96445485448366  | -1.55748473618392 |
| H | -8.43421300135095 | 2.19324175984749  | -1.81314418340288 |
| C | -3.70944638920291 | 6.03316709259343  | -0.80523063793536 |
| C | 5.41839851656876  | 6.11781774276727  | 0.49218702667189  |
| C | 7.38893952958137  | 3.67752815808383  | 0.65781533930130  |
| C | 6.20389605619896  | -4.57011965359917 | 3.74525569195808  |
| C | 3.88578716444297  | -6.59443597854177 | 3.21123687670255  |
| C | -5.06307941350673 | -4.91284421627422 | 1.51791956609888  |
| C | -6.30451011949576 | -2.44469188374900 | -0.00025014177192 |
| C | -3.07376197887929 | 7.14871456865621  | -0.22903284375108 |
| C | -3.38199468296770 | 8.44192507998007  | -0.65509549997144 |
| C | -4.31357089006685 | 8.64169198122272  | -1.68028750438440 |
| C | -4.92250806932829 | 7.53730981539050  | -2.28536971448907 |
| C | -4.62685529272522 | 6.24401251070171  | -1.85084632886120 |
| H | -2.33217256246465 | 6.98203019237177  | 0.55340023763070  |
| H | -2.88813816564133 | 9.29562416322784  | -0.18453257179565 |
| H | -4.56240952909052 | 9.65154226628671  | -2.01689033737050 |
| H | -5.63343685169372 | 7.68348404953824  | -3.10193211197932 |
| H | -5.10786865685525 | 5.39440692180431  | -2.33645149669164 |
| C | 4.73249858331854  | 6.90398383567138  | -0.45095333879704 |
| C | 6.45165454419575  | 6.70570932707562  | 1.24336775076863  |
| C | 6.81296643005348  | 8.03709635116779  | 1.02878269535486  |
| C | 6.15546181174343  | 8.79765662763251  | 0.05567898585746  |
| C | 5.10877591835825  | 8.22860566432823  | -0.67786432513160 |
| H | 6.97607602760103  | 6.11920421245935  | 1.99962265447772  |
| H | 7.61343043282090  | 8.48191170019399  | 1.62463805342418  |
| H | 6.45920701949759  | 9.83082396060196  | -0.13168139352608 |
| C | 8.23289810629293  | 2.87682440147584  | 1.45089942299234  |
| C | 9.60752679331534  | 2.84212095838827  | 1.21527954994852  |
| C | 10.16163214710686 | 3.59051945835670  | 0.17077093752946  |
| H | 7.78744638638841  | 2.26942082728285  | 2.23962508041324  |
| H | 10.24894486320669 | 2.21920103314416  | 1.84320631705734  |
| C | 9.33146751776699  | 4.38061215344740  | -0.63068885946479 |
| H | 11.23589815298517 | 3.54934455648878  | -0.02685846777865 |
| C | 7.95676580274401  | 4.42713465855498  | -0.38912015675616 |
| H | 9.75503574262329  | 4.95954255357976  | -1.45491817521485 |
| H | 7.32123172936840  | 5.03589136958253  | -1.03271729098808 |
| H | 4.57849798832158  | 8.82089035885550  | -1.42732082325482 |

|   |                   |                    |                   |
|---|-------------------|--------------------|-------------------|
| H | 3.90496076230611  | 6.45782399047974   | -1.00456942580817 |
| C | 7.37251292099911  | -4.00615072265258  | 3.20136742275502  |
| C | 6.31780241529502  | -5.40874596888157  | 4.86900219716942  |
| C | 7.57068606434404  | -5.69815281633716  | 5.41329872742028  |
| C | 8.62525376429397  | -4.30945500828454  | 3.73748606758185  |
| C | 8.72939284111621  | -5.16192065868947  | 4.84230176168567  |
| H | 5.42421608745877  | -5.83457831105660  | 5.32749738658457  |
| H | 7.64186787403330  | -6.34681098033618  | 6.28953403571513  |
| H | 9.70756919334488  | -5.40756795789143  | 5.26403051364426  |
| H | 7.27994044986740  | -3.32411047794516  | 2.35519784387116  |
| H | 9.52195361194128  | -3.87239689073220  | 3.29094605542779  |
| C | 4.98229310265241  | -7.32673518051154  | 2.72068891634848  |
| C | 2.83824974013020  | -7.28494813307930  | 3.84709746371605  |
| C | 2.90668322761818  | -8.66781538031048  | 4.02830219446938  |
| C | 4.01074846934106  | -9.38442659820648  | 3.55379627340540  |
| C | 5.03984230922164  | -8.71170246609831  | 2.88659901704053  |
| H | 1.97228584524840  | -6.72098912643029  | 4.19637007754100  |
| H | 2.09306696762760  | -9.18899147244558  | 4.53832296409204  |
| H | 4.06729598289044  | -10.46608849116841 | 3.70008647709501  |
| H | 5.79072888779422  | -6.81161667732062  | 2.20014564438420  |
| H | 5.89370001595230  | -9.26844138987155  | 2.49339534359770  |
| C | -6.27673023856520 | -4.82942365004935  | 2.22236427587686  |
| C | -4.51022010255567 | -6.18069953633455  | 1.26507494033612  |
| C | -6.92580065394325 | -5.98822210801414  | 2.65222822725147  |
| C | -5.17395947451775 | -7.33880938102314  | 1.67306832807510  |
| C | -6.38353767802035 | -7.24641381906621  | 2.37002729642174  |
| H | -6.70650019802835 | -3.85278762677238  | 2.45283730919140  |
| H | -7.85989349586722 | -5.90618257688154  | 3.21267353565849  |
| H | -6.89885582692183 | -8.15072149027519  | 2.70298028930836  |
| H | -3.55092596864770 | -6.24474593789341  | 0.74966288026464  |
| H | -4.73809520146053 | -8.31583902948370  | 1.44955881088113  |
| C | -7.00834197281975 | -1.22741293667399  | 0.08129665965618  |
| C | -6.89256240362676 | -3.51970215506241  | -0.69229335379065 |
| C | -8.27373438800289 | -1.09676242256289  | -0.49123537568150 |
| C | -8.15390288000797 | -3.38085054956970  | -1.27586298332550 |
| C | -8.85258248910503 | -2.17385844296599  | -1.17127398529078 |
| H | -6.53695852082910 | -0.38207433288407  | 0.58361290400246  |
| H | -8.80646347948061 | -0.14645832316241  | -0.40914429766361 |
| H | -9.83968943358680 | -2.06944424340222  | -1.62835549233612 |
| H | -6.35550735740605 | -4.46283606392899  | -0.79805051494406 |
| H | -8.59106162538684 | -4.22125427978833  | -1.82013092659628 |
| P | 0.69459642896870  | 0.11586561053323   | 1.26827764080529  |



|   |                   |                   |                   |
|---|-------------------|-------------------|-------------------|
| O | 0.40686043110744  | 0.19718154656408  | 2.97968595569391  |
| C | 0.24164122457532  | 1.29854448740335  | 3.79563590562904  |
| O | 1.03611704641607  | 0.02453981974602  | -0.43585990941493 |
| C | 1.18031795821755  | -1.09051064154161 | -1.23807324225059 |
| C | 0.07054004389204  | -1.66400442587891 | -1.87664523577502 |
| C | 2.46337534830700  | -1.56811614014670 | -1.53301579912627 |
| C | 0.23913242565703  | -2.70294590749281 | -2.79078943592939 |
| C | 2.63518696846303  | -2.60524850198145 | -2.45409420700150 |
| C | 1.52383223961008  | -3.17763584205255 | -3.08813233839813 |
| C | 1.34900874285605  | 1.87386339041818  | 4.43807433831863  |
| C | -1.04487767926728 | 1.75390156434168  | 4.10714963876069  |
| C | 1.17302025500320  | 2.89010083492145  | 5.37532273903529  |
| C | -1.22401103819922 | 2.76998637901141  | 5.05088483218119  |
| C | -0.11615529791184 | 3.34142186615172  | 5.69136952705712  |
| H | -0.92606070353888 | -1.26861057833522 | -1.67414180753335 |
| H | 3.32706775092997  | -1.10015699929132 | -1.05606001024421 |
| H | -0.61542568010306 | -3.15431880744286 | -3.29884940078106 |
| H | 3.64169980455516  | -2.96424355302701 | -2.69281844351927 |
| O | 1.62498861877788  | -4.18257866875165 | -4.01047756143642 |
| H | 2.34851432761806  | 1.49495863880900  | 4.21811777180820  |
| H | -1.90603135569856 | 1.28343573071447  | 3.62825114822378  |
| H | 2.02490188180845  | 3.34073982722280  | 5.88846110168865  |
| H | -2.23326182806932 | 3.11233884291694  | 5.30245415361178  |
| O | -0.22369667719709 | 4.32377430394462  | 6.63730000478701  |
| H | 2.55768142375814  | -4.42458510109154 | -4.10910748346065 |
| H | -1.15969781167582 | 4.54115192211570  | 6.75882184475832  |

**Table S4** Cartesian coordinates of TPyzCAP(OPhNMe<sub>2</sub>)<sub>2</sub> at B3LYP/cc-pVDZ level of theory:

|   |                   |                   |                  |
|---|-------------------|-------------------|------------------|
| C | -2.55979593943177 | 2.24510023672540  | 0.30701895280517 |
| C | -1.63204848292078 | 3.32166850148458  | 0.27157123631487 |
| C | -0.31051882686447 | 2.78879420882344  | 0.57180590496087 |
| N | 0.85959532335321  | 3.40527368036364  | 0.60087280004493 |
| C | 1.95248149218215  | 2.71071810147162  | 0.87832405525823 |
| C | 3.38451803110030  | 1.00219568669652  | 1.44275260433992 |
| N | 3.86174937133899  | -0.18504378079569 | 1.77257381194364 |
| C | 3.08763227800640  | -1.24800005544892 | 1.87536473471210 |
| C | 3.51623816081055  | -2.56258832975798 | 2.30115546214278 |
| C | 2.39702075851493  | -3.41214935249041 | 2.26696632866527 |
| C | 1.25306138388830  | -2.63576420339492 | 1.82947432007941 |
| N | 1.72565149161056  | -1.33431683918364 | 1.58922126231956 |
| N | 2.05220322037504  | 1.36127406257121  | 1.25332433099673 |
| N | -0.49884337215591 | 1.44530023026677  | 0.78753258428437 |

|   |                   |                   |                   |
|---|-------------------|-------------------|-------------------|
| C | -1.81142325791789 | 1.05382129723387  | 0.60387391249918  |
| C | -1.97681345628890 | -0.32111716493487 | 0.75805666230619  |
| N | 0.02304706437547  | -3.10449640837625 | 1.70799466845733  |
| C | -0.94860208959291 | -2.28613939734065 | 1.33369231106354  |
| C | -2.37383314366516 | -2.54418145938960 | 1.19138721201842  |
| C | -3.00492435454293 | -1.32547114006923 | 0.81959262199770  |
| N | -0.78230320745151 | -0.95855247523429 | 1.03653379133237  |
| C | 3.30921434786085  | 3.22171661664624  | 0.82000755101399  |
| C | 4.18326786537415  | 2.17178116689637  | 1.15441495955785  |
| N | -3.87480398276491 | 2.42523407898303  | 0.14360643609709  |
| C | -4.26795770306697 | 3.68176730330978  | -0.09880103627863 |
| C | -3.30967099987625 | 4.75439766232537  | -0.27007501622749 |
| N | -2.00340716835123 | 4.56613933296957  | -0.03907476413979 |
| N | 3.75279284888227  | 4.44265947165754  | 0.49626005918784  |
| C | 5.08341960437178  | 4.58726917141197  | 0.44771937438995  |
| C | 5.97872149515967  | 3.46456526027233  | 0.65480619258719  |
| N | 4.71710662802111  | -2.96630419865533 | 2.73028682707830  |
| C | 4.80411622237706  | -4.25201549644375 | 3.09263937720696  |
| C | 3.68023489957806  | -5.15663450004480 | 2.93923836489855  |
| N | 2.47332468377514  | -4.71455505178977 | 2.56479378746139  |
| N | -3.07223896378431 | -3.65773367644464 | 1.42557257932680  |
| C | -4.39925244678988 | -3.57256419667861 | 1.25796277646079  |
| C | -5.02003909448641 | -2.36997690383464 | 0.74302578953500  |
| N | -4.31416911315279 | -1.24531071301131 | 0.56781665561622  |
| C | -5.74716215654298 | 3.87476780995762  | -0.12316173464123 |
| N | 5.51170502552070  | 2.27743576827266  | 1.05982667487875  |
| C | -6.55451082496961 | 2.92546025844979  | -0.77455873682931 |
| C | -7.94412038908226 | 3.06517424654806  | -0.78496684246594 |
| C | -8.54893792842621 | 4.13701182337715  | -0.11871068547816 |
| C | -7.75571854382972 | 5.06524753000658  | 0.56388810602785  |
| C | -6.36521755470741 | 4.94112693418533  | 0.55527476762650  |
| H | -5.75468681352682 | 5.67254579346116  | 1.08674837527260  |
| H | -9.63613739773424 | 4.24880571968852  | -0.12783485009202 |
| H | -8.22300321436632 | 5.89285096303415  | 1.10283388948066  |
| H | -6.07802313589629 | 2.07881060499579  | -1.27087688254104 |
| H | -8.55683986877177 | 2.33279475898271  | -1.31532855127995 |
| C | -3.67643153538503 | 6.12318828780401  | -0.73245973440895 |
| C | 5.55102728712500  | 5.97436480571185  | 0.16769069824113  |
| C | 7.44496312083032  | 3.47235197636752  | 0.37374327234817  |
| C | 6.11962381179359  | -4.64389165883770 | 3.67747398412788  |
| C | 3.76996600483985  | -6.63215635447687 | 3.13989917222929  |
| C | -5.15561136705424 | -4.77946718982450 | 1.69760998038812  |

|   |                   |                   |                   |
|---|-------------------|-------------------|-------------------|
| C | -6.44865306550345 | -2.26367011436646 | 0.32909252750067  |
| C | -3.00489792252107 | 7.23290276269597  | -0.18731659899164 |
| C | -3.31302751900997 | 8.52772764212186  | -0.60900273005873 |
| C | -4.27908653439341 | 8.73390131529005  | -1.60058365088572 |
| C | -4.92533528982823 | 7.63431287848322  | -2.17507195546334 |
| C | -4.63111451909301 | 6.33997119300695  | -1.74269119695829 |
| H | -2.23630799999625 | 7.06050206866670  | 0.56746326766293  |
| H | -2.79168236699400 | 9.37776742087061  | -0.16193605999917 |
| H | -4.52606644525783 | 9.74496240694806  | -1.93498981900126 |
| H | -5.66429622999173 | 7.78542602853482  | -2.96546703058971 |
| H | -5.14165529543112 | 5.49279430836311  | -2.20219431495015 |
| C | 4.87899307115755  | 6.73705781167773  | -0.80388167453749 |
| C | 6.61339608950025  | 6.56212769046907  | 0.87683279408078  |
| C | 7.01395229086060  | 7.86984218513093  | 0.59593465590449  |
| C | 6.36762449372992  | 8.60567523446010  | -0.40339332088706 |
| C | 5.29420448085277  | 8.03685014116742  | -1.09740592261491 |
| H | 7.12984422777852  | 5.99321699285363  | 1.65203070344050  |
| H | 7.83691138698354  | 8.31515970130635  | 1.16005630263857  |
| H | 6.70138233670493  | 9.61867238037279  | -0.64270835039378 |
| C | 8.28230888798122  | 2.64684468248013  | 1.14869737149233  |
| C | 9.64157240643567  | 2.53603697158378  | 0.85608551973657  |
| C | 10.18853747380270 | 3.23402396383917  | -0.22642264255553 |
| H | 7.84114368243448  | 2.07721038117278  | 1.96724538266470  |
| H | 10.27624388990590 | 1.89236040381450  | 1.46987438521600  |
| C | 9.36554922872833  | 4.05145843465168  | -1.00753196358778 |
| H | 11.24903640215276 | 3.12956795756441  | -0.47014716943098 |
| C | 8.00635764182769  | 4.17268876481328  | -0.71030846144199 |
| H | 9.78120287496450  | 4.59258283581336  | -1.86105187785776 |
| H | 7.37609568920690  | 4.79856280056146  | -1.34226227215004 |
| H | 4.77334513476102  | 8.60994103176519  | -1.86819226668293 |
| H | 4.03132482969250  | 6.29218056155330  | -1.32732276334212 |
| C | 7.29403847893336  | -4.09411309122723 | 3.13142313935370  |
| C | 6.22608264554163  | -5.48787953968831 | 4.79775738143823  |
| C | 7.47679123977472  | -5.79572831855794 | 5.33718056772701  |
| C | 8.54433236606909  | -4.41578496600214 | 3.66246886020157  |
| C | 8.64072135376331  | -5.27277640483411 | 4.76449874441249  |
| H | 5.32827092380832  | -5.90335563227114 | 5.25751344843865  |
| H | 7.54207919501380  | -6.44817788314399 | 6.21109285349551  |
| H | 9.61689545087901  | -5.53234470993597 | 5.18261814454705  |
| H | 7.20766032581422  | -3.40805999982570 | 2.28783385291898  |
| H | 9.44528406534775  | -3.98914705693381 | 3.21429411279406  |
| C | 4.85400286815290  | -7.38237948251991 | 2.64914071429026  |

|   |                    |                    |                   |
|---|--------------------|--------------------|-------------------|
| C | 2.71113202504953   | -7.30553933310609  | 3.77550781001210  |
| C | 2.75630128430630   | -8.68958454453108  | 3.95574607499641  |
| C | 3.84808020432820   | -9.42430726932831  | 3.48064574500149  |
| C | 4.88853600966801   | -8.76831689264846  | 2.81434130795451  |
| H | 1.85468139816205   | -6.72726868337024  | 4.12494228237888  |
| H | 1.93412991350574   | -9.19760330404645  | 4.46544100755207  |
| H | 3.88588813326536   | -10.50694870687282 | 3.62593072037576  |
| H | 5.67067236080544   | -6.88018496798367  | 2.12874520975171  |
| H | 5.73315250323118   | -9.33887843296674  | 2.42094550508247  |
| C | -6.32425494425534  | -4.67601320803457  | 2.47258354151078  |
| C | -4.64128481966279  | -6.05721553220354  | 1.41426706231248  |
| C | -6.96653567223169  | -5.82337404848289  | 2.94236951923859  |
| C | -5.29840827689026  | -7.20364191031913  | 1.86392228412687  |
| C | -6.46331020037138  | -7.09082093283889  | 2.63098191291481  |
| H | -6.72378356121949  | -3.69296627655182  | 2.72810734286485  |
| H | -7.86438607763747  | -5.72426146828656  | 3.55680096221460  |
| H | -6.97309139438105  | -7.98598617657141  | 2.99579644771317  |
| H | -3.71410948630580  | -6.13767370145474  | 0.84530931426734  |
| H | -4.89166077440245  | -8.18777205892689  | 1.61737644475045  |
| C | -7.12859728565551  | -1.05249057237152  | 0.55747578167383  |
| C | -7.11213403429594  | -3.29230773238034  | -0.36373406178779 |
| C | -8.44684830392855  | -0.88550129241483  | 0.13089578426356  |
| C | -8.42501094611921  | -3.11508821684208  | -0.80676952517187 |
| C | -9.09932157013073  | -1.91520577066906  | -0.55588918293539 |
| H | -6.60129938597289  | -0.24189160103119  | 1.06144837853238  |
| H | -8.96224941843095  | 0.05654559669021   | 0.33257782860331  |
| H | -10.12644685678253 | -1.77982510594882  | -0.90406100632339 |
| H | -6.59509106531839  | -4.22876228072611  | -0.57763125944470 |
| H | -8.92172352269639  | -3.91930559930648  | -1.35446736232186 |
| P | 0.68704547671671   | 0.12271898406712   | 1.17867588976574  |
| O | 0.42588871945460   | 0.20564988869975   | 2.89379443430538  |
| C | 0.03409639172506   | 1.28221526365245   | 3.66918609265925  |
| O | 0.99653091702444   | 0.03334013432849   | -0.52789056640891 |
| C | 1.38429450127824   | -1.05917944508262  | -1.28196553238915 |
| C | 0.43280264246026   | -1.81175455174569  | -1.97765110696511 |
| C | 2.74016981498586   | -1.35088272580182  | -1.47322958770056 |
| C | 0.82132013109298   | -2.83675675842232  | -2.84148866899744 |
| C | 3.13740106056551   | -2.37274604082479  | -2.33255517110736 |
| C | 2.18868931373056   | -3.14040818255815  | -3.05131050794161 |
| C | 0.99086986972177   | 2.04177009196367   | 4.35103327216722  |
| C | -1.32014743964114  | 1.53707254737922   | 3.91295375832277  |
| C | 0.60730516370645   | 3.03658789739012   | 5.25080413615192  |

|   |                   |                   |                   |
|---|-------------------|-------------------|-------------------|
| C | -1.71290045286165 | 2.53240242711040  | 4.80612369415708  |
| C | -0.75879807451942 | 3.31566242227449  | 5.49980886696468  |
| H | -0.62526022384405 | -1.57109231272864 | -1.85532339689625 |
| H | 3.49702714779152  | -0.76224695510641 | -0.95214861911522 |
| H | 0.04429417859069  | -3.39712203788996 | -3.35980984449825 |
| H | 4.20344901453481  | -2.56175418171921 | -2.45094150894018 |
| N | 2.58985954649865  | -4.13550740103320 | -3.93622660141174 |
| H | 2.04934573404834  | 1.82266834298105  | 4.19694453614454  |
| H | -2.07842224048999 | 0.92867667918404  | 3.41736928489630  |
| H | 1.38837567697440  | 3.59139204376496  | 5.76888763885655  |
| H | -2.77845224086208 | 2.68707920594652  | 4.97018617947056  |
| N | -1.15100309082211 | 4.30744113122342  | 6.39413976259574  |
| C | 1.59579381412950  | -5.00509249914674 | -4.53312782228419 |
| C | 3.98384152175093  | -4.53510764323930 | -3.97765293896733 |
| H | 4.63556025780532  | -3.69892441747882 | -4.28704556883703 |
| H | 4.10766071178065  | -5.33767051626217 | -4.71642405701744 |
| H | 4.35735599149922  | -4.90577343700633 | -3.00156432472195 |
| H | 1.01840071776776  | -5.58563129335986 | -3.78491832541184 |
| H | 2.09875916331160  | -5.71591289161115 | -5.20222814625820 |
| H | 0.87324932876993  | -4.43103703020696 | -5.14025762677260 |
| C | -2.54869973689445 | 4.41584823152131  | 6.76812695041519  |
| C | -0.15590429178090 | 4.93806820884730  | 7.24001431405430  |
| H | -2.94879935317220 | 3.48863264640880  | 7.22753668715388  |
| H | -3.18230931989849 | 4.65493888493618  | 5.89610359267739  |
| H | -2.66665083252118 | 5.23200539302021  | 7.49290009654060  |
| H | 0.59115668763776  | 5.48907895731545  | 6.64184838782277  |
| H | 0.39255646705500  | 4.21577226274545  | 7.87880654062266  |
| H | -0.65421723294156 | 5.66344414276880  | 7.89676686401594  |

## III. Electrochemical measurements

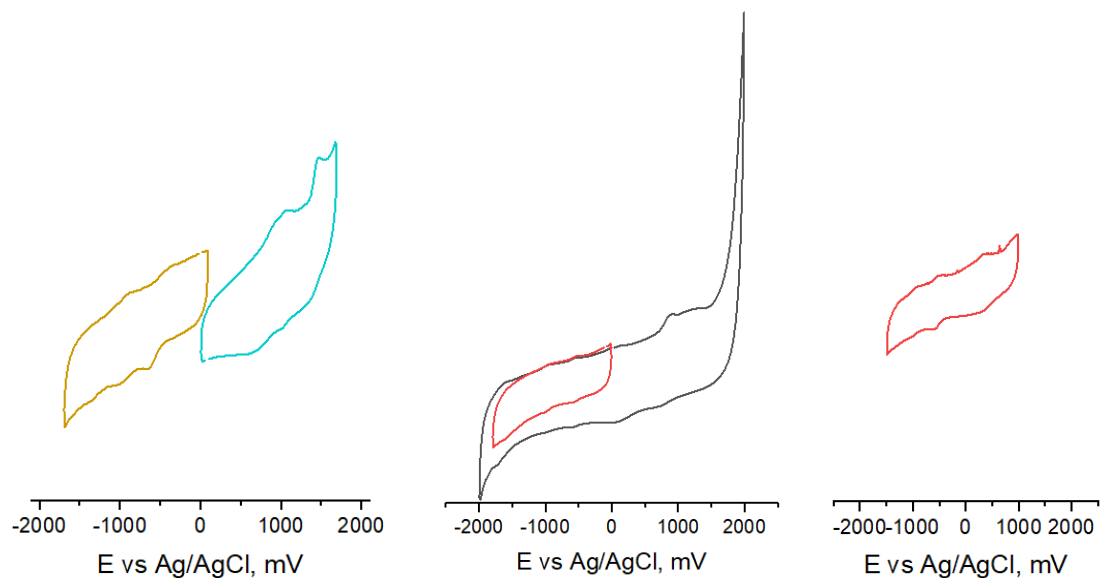

**Figure S8.** Cyclic voltammogram of  $[TPyzCAP(OPh)_2]$  in acetonitrile solution with 0.1M tbaClO<sub>4</sub> as supporting electrolyte. Scan rate – 50mV/s

**Figure S9.** Cyclic voltammogram of  $[TPyzCAP(OPhOH)_2]$  in acetonitrile solution with 0.1M tbaClO<sub>4</sub> as supporting electrolyte. Scan rate – 50mV/s

**Figure S10.** Cyclic voltammogram of  $[TPyzCAP(OPhNMe_2)_2]$  in acetonitrile solution with 0.1M tbaClO<sub>4</sub> as supporting electrolyte. Scan rate – 50mV/s.

## IV. TD DFT calculations

**Table S5.** Calculated composition of the lowest excited states and corresponding oscillator strength for [TPyzCAP(OH)<sub>2</sub>].

| Excited state                                            | Composition                                                                                                                                      | F    | $\lambda_{\text{calc}}$ | Type                                                                               | $\lambda_{\text{exp}}$ |
|----------------------------------------------------------|--------------------------------------------------------------------------------------------------------------------------------------------------|------|-------------------------|------------------------------------------------------------------------------------|------------------------|
| [Ph <sub>8</sub> Pyz <sub>4</sub> CzP(OH) <sub>2</sub> ] |                                                                                                                                                  |      |                         |                                                                                    |                        |
| 1                                                        | HOMO -> LUMO (74%) (1a -> 1a*)<br>HOMO-1 -> LUMO+1 (19%) (1b -> 1b*)                                                                             | 0.35 | 580.0                   | Q                                                                                  | -                      |
| 2                                                        | HOMO -> LUMO+1 (69%) (1a -> 1b*)<br>HOMO-1 -> LUMO (25%) (1b -> 1a*)                                                                             | 0.08 | 568.1                   | Q                                                                                  | -                      |
| 3                                                        | HOMO-2 -> LUMO (62%)<br>HOMO-1 -> LUMO (9%)                                                                                                      | 0.12 | 449.4                   | CT Ph->Cz                                                                          |                        |
| 4                                                        | HOMO -> LUMO+2 (69%)<br>HOMO-4 -> LUMO (14%)                                                                                                     | 0.08 | 445.9                   | CT Ph->Cz                                                                          |                        |
| 5                                                        | HOMO-3 -> LUMO (56%)<br>HOMO-4 -> LUMO (13%)<br>HOMO -> LUMO+4 (9%)                                                                              | 0.17 | 441.1                   | CT Ph->Cz                                                                          |                        |
| 6                                                        | HOMO-1 -> LUMO (29%)<br>HOMO-5 -> LUMO (18%)<br>HOMO-2 ->LUMO (16%)                                                                              | 0.51 | 433.7                   | CT Ph->Cz                                                                          |                        |
| 7                                                        | HOMO-4 -> LUMO (42%)<br>HOMO-3 -> LUMO (17%)<br>HOMO-5 -> LUMO (16%)                                                                             | 0.13 | 428.4                   | CT Ph->Cz                                                                          |                        |
| 8                                                        | HOMO-2 -> LUMO+1 (21%)<br>HOMO-1 ->LUMO+1 (18%)<br>HOMO -> LUMO+4 (13%)<br>HOMO-4 -> LUMO (13%)<br>HOMO-3 -> LUMO+1 (12%)<br>HOMO -> LUMO+5 (9%) | 0.21 | 424.0                   | CT Ph->Cz                                                                          |                        |
| 9                                                        | HOMO -> LUMO+5 (21%)<br>HOMO-1 -> LUMO+1 (14%)<br>HOMO -> LUMO+4 (11%)<br>HOMO-2 -> LUMO+1 (11%)                                                 | 0.13 | 419.2                   | CT Cz -> Pyz<br>CT Ph -> Cz                                                        |                        |
| 11                                                       | HOMO-3 -> LUMO+1 (21%)<br>HOMO -> LUMO+3 (20%)<br>HOMO-2 -> LUMO+1 (17%)<br>HOMO-1 -> LUMO+1 (10%)                                               | 0.30 | 415.3                   | CT Ph -> Cz<br>CT Cz -> Pyz                                                        |                        |
| 12                                                       | HOMO-4 -> LUMO+1 (38%)<br>HOMO-2 -> LUMO+1 (18%)<br>HOMO -> LUMO+5 (14%)                                                                         | 0.32 | 406.5                   | CT Ph -> Cz<br>CT Cz -> Pyz                                                        |                        |
| 13                                                       | HOMO-3 -> LUMO+1 (48%)<br>HOMO -> LUMO+5 (21%)<br>HOMO-4 -> LUMO+1 (10%)                                                                         | 0.20 | 405.4                   | CT Ph -> Cz<br>CT Cz -> Pyz                                                        |                        |
| 14                                                       | HOMO-4 -> LUMO+1 (42%)<br>HOMO -> LUMO+5 (16%)                                                                                                   | 0.74 | 400.9                   | CT Ph -> Cz<br>CT Cz -> Pyz<br>B                                                   | -                      |
| 17                                                       | HOMO-5 -> LUMO (19%)<br>HOMO-1 -> LUMO (15%) (1b -> 1a*)<br>HOMO -> LUMO+3 (14%)                                                                 | 1.19 | 386.5                   | CT Ph -> Cz<br>CT Cz -> Pyz<br>B                                                   | -                      |
| 19                                                       | HOMO-13 -> LUMO (45%)<br>HOMO-5 -> LUMO+1 (13%)                                                                                                  | 0.21 | 377.6                   | CT Pyz -> Cz<br>(impure,<br>make sure<br>(sigma orbs +<br>pi orbs))<br>CT Ph -> Cz |                        |
| 20                                                       | HOMO-13 -> LUMO (22%)                                                                                                                            | 0.17 | 377.3                   | CT Pyz -> Cz                                                                       |                        |

|    |                                                                          |      |       |                                                                                    |  |
|----|--------------------------------------------------------------------------|------|-------|------------------------------------------------------------------------------------|--|
|    | HOMO-5 -> LUMO+1 (19%)<br>HOMO-14 -> LUMO (14%)                          |      |       | (impure,<br>make sure<br>(sigma orbs +<br>pi orbs))<br>CT Ph -> Cz                 |  |
| 21 | HOMO-5 -> LUMO+1 (33%)<br>HOMO-14 -> LUMO (13%)<br>HOMO-15 -> LUMO (10%) | 0.32 | 375.0 | CT Pyz -> Cz<br>(impure,<br>make sure<br>(sigma orbs +<br>pi orbs))<br>CT Ph -> Cz |  |
| 29 | HOMO -> LUMO+6 (90%)                                                     | 0.24 | 351.6 | CT Cz -> Ph???                                                                     |  |
| 32 | HOMO-1 -> LUMO+3 (38%)<br>HOMO-5 -> LUMO (20%)<br>HOMO-7 -> LUMO (11%)   | 0.17 | 345.3 | CT Cz -> Pyz<br>CT Ph -> Cz                                                        |  |
| 34 | HOMO-1 -> LUMO+4 (27%)<br>HOMO-5 -> LUMO (19%)<br>HOMO-6 -> LUMO (19%)   | 0.13 | 342.9 | CT Cz -> Pyz<br>CT Ph + Pyz -><br>Cz                                               |  |
| 39 | HOMO-7 -> LUMO (45%)<br>HOMO-1 -> LUMO+3 (13%)                           | 0.09 | 336.0 | CT Ph -> Cz<br>CT Cz -> Pyz                                                        |  |



**Table S6.** Calculated composition of the lowest excited states and corresponding oscillator strength for [TPyzCAP(OPh)<sub>2</sub>].

| Excited state                                             | Composition                                                                                    | F    | $\lambda_{\text{calc}}$ | Type                                      | $\lambda_{\text{exp}}$ |
|-----------------------------------------------------------|------------------------------------------------------------------------------------------------|------|-------------------------|-------------------------------------------|------------------------|
| [Ph <sub>8</sub> Pyz <sub>4</sub> CzP(OPh) <sub>2</sub> ] |                                                                                                |      |                         |                                           |                        |
| 1                                                         | HOMO -> LUMO (76%) (1a -> 1a*)<br>HOMO-1 -> LUMO+1 (18%) (1b -> 1b*)                           | 0.33 | 581.7                   | Q                                         | 655                    |
| 2                                                         | HOMO -> LUMO+1 (72%) (1a -> 1b*)<br>HOMO-1 -> LUMO (23%) (1b -> 1a*)                           | 0.08 | 572.0                   | Q                                         | 601                    |
| 4                                                         | HOMO-3 -> LUMO (58%)<br>HOMO-1 -> LUMO (25%)<br>HOMO -> LUMO+3 (10%)                           | 0.29 | 446.8                   | CT Ph -> Cz<br>CT Cz -> Pyz               |                        |
| 5                                                         | HOMO-2 -> LUMO (62%)<br>HOMO-6 -> LUMO (15%)                                                   | 0.15 | 441.5                   | CT Ph -> Cz<br>CT L -> Cz                 |                        |
| 6                                                         | HOMO-2 -> LUMO (56%)<br>HOMO-4 -> LUMO (24%)                                                   | 0.09 | 437.4                   | CT Ph -> Cz                               |                        |
| 8                                                         | HOMO-1 -> LUMO (23%)<br>HOMO-2 -> LUMO+1 (19%)<br>HOMO-3 -> LUMO (19%)<br>HOMO -> LUMO+5 (11%) | 0.39 | 430.0                   | CT Ph -> Cz                               |                        |
| 9                                                         | HOMO-6 -> LUMO (25%)<br>HOMO-2 -> LUMO (23%)<br>HOMO-1 -> LUMO+1 (16%)<br>HOMO-4 -> LUMO (15%) | 0.12 | 426.3                   | CT L -> Cz<br>CT Ph -> Cz                 |                        |
| 11                                                        | HOMO-4 -> LUMO (47%)<br>HOMO-1 -> LUMO+1 (27%)<br>HOMO -> LUMO+4 (10%)                         | 0.29 | 422.3                   | CT Ph -> Cz<br>CT Cz -> Pyz               |                        |
| 12                                                        | HOMO-3 -> LUMO (35%)<br>HOMO-5 -> LUMO+1 (30%)<br>HOMO -> LUMO+5 (19%)                         | 0.12 | 417.6                   | CT Ph -> Cz<br>CT L -> Cz<br>CT Cz -> Pyz |                        |
| 16                                                        | HOMO -> LUMO+5 (34%)<br>HOMO-2 -> LUMO+1 (28%)<br>HOMO-7 -> LUMO (11%)                         | 0.11 | 406.2                   | CT Cz -> Pyz<br>CT Ph -> Cz<br>CT L -> Cz |                        |
| 17                                                        | HOMO-3 -> LUMO+1 (36%)<br>HOMO -> LUMO+5 (31%)<br>HOMO-1 -> LUMO+1 (10%) (1b -> 1b*)           | 0.99 | 402.7                   | CT Ph -> Cz<br>CT Cz -> Pyz<br>B          | 455                    |
| 18                                                        | HOMO-4 -> LUMO+1 (81%)<br>HOMO-6 -> LUMO+1 (10%)                                               | 0.18 | 402.3                   | CT Ph -> Cz<br>CT L -> Cz                 |                        |
| 21                                                        | HOMO-7 -> LUMO (16%)<br>HOMO -> LUMO+3 (12%)<br>HOMO-1 -> LUMO (12%) (1b -> 1a*)               | 0.97 | 386.4                   | CT L -> Cz<br>CT Cz -> Pyz<br>B           | 420                    |
| 23                                                        | HOMO-17 -> LUMO (52%)<br>HOMO-12 -> LUMO (16%)<br>HOMO-16 -> LUMO (13%)                        | 0.09 | 377.9                   | CT Ph -> Cz<br>CT L -> Cz                 |                        |
| 25                                                        | HOMO-7 -> LUMO+1 (29%)<br>HOMO-13 -> LUMO (28%)<br>HOMO-19 -> LUMO (16%)                       | 0.18 | 375.1                   | CT Ph -> Cz<br>CT L -> Cz                 |                        |
| 26                                                        | HOMO-12 -> LUMO (63%)<br>HOMO-11 -> LUMO+1 (16%)                                               | 0.15 | 373.4                   | CT Ph -> Cz<br>CT L -> Cz                 |                        |
| 27                                                        | HOMO-13 -> LUMO (69%)<br>HOMO-7 -> LUMO+1 (12%)                                                | 0.12 | 373.4                   | CT Ph -> Cz<br>CT L -> Cz                 |                        |
| 28                                                        | HOMO-11 -> LUMO+1 (61%)<br>HOMO-12 -> LUMO (12%)                                               | 0.11 | 372.3                   | CT Ph -> Cz<br>CT L -> Cz                 |                        |
| 38                                                        | HOMO -> LUMO+6 (89%)                                                                           | 0.21 | 348.7                   | CT L -> Pyz                               |                        |

**Table S7.** Calculated composition of the lowest excited states and corresponding oscillator strength for [TPyzCAP(OPhOH)<sub>2</sub>].

| Excited state                                             | Composition                                                                                                            | F    | $\lambda_{\text{calc}}$ | Type                      | $\lambda_{\text{exp}}$ |
|-----------------------------------------------------------|------------------------------------------------------------------------------------------------------------------------|------|-------------------------|---------------------------|------------------------|
| [Ph <sub>8</sub> Pyz <sub>4</sub> CzP(OHQ) <sub>2</sub> ] |                                                                                                                        |      |                         |                           |                        |
| 1                                                         | HOMO -> LUMO (75%) (1a -> 1a*)<br>HOMO-3 -> LUMO+1 (17%) (1b -> 1b*)                                                   | 0.31 | 583.7                   | Q                         | 654                    |
| 2                                                         | HOMO -> LUMO+1 (70%) (1a -> 1b*)<br>HOMO-3 -> LUMO (22%) (1b -> 1a*)                                                   | 0.08 | 574.2                   | Q                         | 603                    |
| 8                                                         | HOMO-5 -> LUMO (45%)<br>HOMO-3 -> LUMO (25%)<br>HOMO -> LUMO+3 (12%)<br>HOMO-4 -> LUMO (10%)                           | 0.28 | 445.9                   | CT Ph -> Cz               |                        |
| 9                                                         | HOMO-4 -> LUMO (40%)<br>HOMO -> LUMO+4 (18%)<br>HOMO-5 -> LUMO (13%)<br>HOMO-6 -> LUMO (12%)                           | 0.19 | 439.3                   | CT Ph -> Cz               |                        |
| 10                                                        | HOMO-3 -> LUMO (20%)<br>HOMO-4 -> LUMO (16%)<br>HOMO-4 -> LUMO+1 (11%)<br>HOMO -> LUMO+5 (11%)                         | 0.36 | 430.4                   | CT Ph -> Cz               |                        |
| 11                                                        | HOMO-3 -> LUMO+1 (20%)<br>HOMO-4 -> LUMO (17%)<br>HOMO-5 -> LUMO (12%)<br>HOMO -> LUMO+4 (11%)<br>HOMO-6 -> LUMO (10%) | 0.18 | 427.4                   | CT Ph -> Cz               |                        |
| 12                                                        | HOMO-6 -> LUMO (28%)<br>HOMO-4 -> LUMO+1 (22%)<br>HOMO -> LUMO+5 (17%)                                                 | 0.09 | 423.8                   | CT Ph -> Cz               |                        |
| 14                                                        | HOMO-4 -> LUMO+1 (23%)<br>HOMO -> LUMO+3 (20%)<br>HOMO-7 -> LUMO (17%)<br>HOMO -> LUMO+3 (17%)                         | 0.14 | 417.0                   | CT Ph -> Cz               |                        |
| 15                                                        | HOMO-5 -> LUMO+1 (39%)<br>HOMO -> LUMO+4 (13%)<br>HOMO -> LUMO+3 (12%)<br>HOMO-3 -> LUMO+1 (10%)                       | 0.31 | 415.6                   | CT Ph -> Cz               |                        |
| 16                                                        | HOMO -> LUMO+5 (34%)<br>HOMO-4 -> LUMO+1 (32%)<br>HOMO-7 -> LUMO (14%)                                                 | 0.11 | 406.9                   | CT Ph -> Cz               |                        |
| 17                                                        | HOMO-5 -> LUMO+1 (32%)<br>HOMO-6 -> LUMO+1 (30%)<br>HOMO -> LUMO+4 (17%)                                               | 0.72 | 404.1                   | CT Ph -> Cz               | 452                    |
| 18                                                        | HOMO-6 -> LUMO+1 (59%)                                                                                                 | 0.54 | 400.1                   | CT Ph -> Cz               |                        |
| 21                                                        | HOMO-7 -> LUMO (21%)<br>HOMO-3 -> LUMO (13%) (1b -> 1a*)<br>HOMO -> LUMO+3 (10%)                                       | 0.97 | 386.3                   | CT Ph -> Cz<br>B          | 420                    |
| 25                                                        | HOMO-16 -> LUMO (33%)<br>HOMO-7 -> LUMO+1 (16%)<br>HOMO-14 -> LUMO (11%)                                               | 0.09 | 377.3                   | CT Ph -> Cz<br>CT L -> Cz |                        |
| 26                                                        | HOMO-19 -> LUMO (29%)<br>HOMO-16 -> LUMO (27%)<br>HOMO-7 -> LUMO+1 (12%)                                               | 0.18 | 376.8                   | CT Ph -> Cz               |                        |
| 27                                                        | HOMO-7 -> LUMO+1 (42%)<br>HOMO-19 -> LUMO (23%)                                                                        | 0.25 | 374.7                   | CT Ph -> Cz               |                        |

**Table S8.** Calculated composition of the lowest excited states and corresponding oscillator strength for [TPyzCAP(OPhNMe<sub>2</sub>)<sub>2</sub>].

| Excited state                                                 | Composition                                                                                                                          | F    | $\lambda_{\text{calc}}$ | Type                             | $\lambda_{\text{exp}}$ |
|---------------------------------------------------------------|--------------------------------------------------------------------------------------------------------------------------------------|------|-------------------------|----------------------------------|------------------------|
| [Ph <sub>8</sub> Pyz <sub>4</sub> CzP(O-pDMAP) <sub>2</sub> ] |                                                                                                                                      |      |                         |                                  |                        |
| 5                                                             | HOMO-2 -> LUMO (75%) (1a -> 1a*)<br>HOMO-3 -> LUMO+1 (18%) (1b -> 1b*)                                                               | 0.31 | 585.5                   | Q                                | 653                    |
| 6                                                             | HOMO-2 -> LUMO+1 (75%) (1a -> 1b*)<br>HOMO-3 -> LUMO (23%) (1b -> 1a*)                                                               | 0.09 | 574.7                   | Q                                | 603                    |
| 14                                                            | HOMO-4 -> LUMO (30%)<br>HOMO-2 -> LUMO+3 (17%)<br>HOMO-3 -> LUMO (17%) (1b -> 1a*)<br>HOMO-5 -> LUMO (16%)<br>HOMO -> LUMO+5 (11%)   | 0.20 | 441.9                   | CT Ph -> Cz<br>CT Cz -> Pyz      |                        |
| 16                                                            | HOMO-2 -> LUMO+4 (34%)<br>HOMO-3 -> LUMO+1 (16%) (1b -> 1b*)<br>HOMO-4 -> LUMO (13%)<br>HOMO-5 -> LUMO (12%)<br>HOMO-6 -> LUMO (10%) | 0.19 | 436.6                   | CT Cz -> Pyz<br>CT Ph -> Cz      |                        |
| 18                                                            | HOMO-2 -> LUMO+5 (29%)<br>HOMO-4 -> LUMO (17%)<br>HOMO-3 -> LUMO (16%) (1b -> 1a*)<br>HOMO-4 -> LUMO+1 (12%)                         | 0.25 | 428.9                   | CT Cz -> Pyz<br>CT Ph -> Cz      |                        |
| 22                                                            | HOMO-7 -> LUMO (37%)<br>HOMO-4 -> LUMO+1 (26%)<br>HOMO-2 -> LUMO+3 (11%)                                                             | 0.30 | 414.9                   | CT Ph -> Cz<br>CT Cz -> Pyz      |                        |
| 23                                                            | HOMO-5 -> LUMO+1 (26%)<br>HOMO-3 -> LUMO+1 (21%) (1b -> 1b*)<br>HOMO-2 -> LUMO+4 (10%)                                               | 0.67 | 411.4                   | CT Ph -> Cz<br>CT Cz -> Pyz      |                        |
| 24                                                            | HOMO-4 -> LUMO+1 (39%)<br>HOMO-2 -> LUMO+5 (23%)<br>HOMO-5 -> LUMO+1 (15%)                                                           | 0.27 | 405.5                   | CT Ph -> Cz<br>CT Cz -> Pyz      |                        |
| 25                                                            | HOMO-5 -> LUMO+1 (43%)<br>HOMO-2 -> LUMO+4 (14%)<br>HOMO-3 -> LUMO+1 (10%) (1b -> 1b*)                                               | 0.90 | 400.7                   | CT Ph -> Cz<br>CT Cz -> Pyz<br>B | 455                    |
| 26                                                            | HOMO-6 -> LUMO+1 (80%)                                                                                                               | 0.31 | 397.0                   | CT Ph -> Cz                      |                        |
| 28                                                            | HOMO-7 -> LUMO (18%)<br>HOMO-8 -> LUMO (17%)<br>HOMO-3 -> LUMO (12%) (1b -> 1a*)                                                     | 0.67 | 387.8                   | CT Ph -> Cz<br>CT L -> Cz<br>B   | 419                    |
| 30                                                            | HOMO-8 -> LUMO (64%)<br>HOMO-11 -> LUMO (15%)                                                                                        | 0.09 | 384.7                   | CT L -> Cz<br>CT Ph -> Cz        |                        |
| 33                                                            | HOMO-7 -> LUMO+1 (46%)<br>HOMO-16 -> LUMO (15%)                                                                                      | 0.12 | 376.5                   | CT Ph -> Cz                      |                        |
| 34                                                            | HOMO-15 -> LUMO (57%)<br>HOMO-14 -> LUMO (10%)                                                                                       | 0.11 | 375.3                   | CT Ph -> Cz                      |                        |

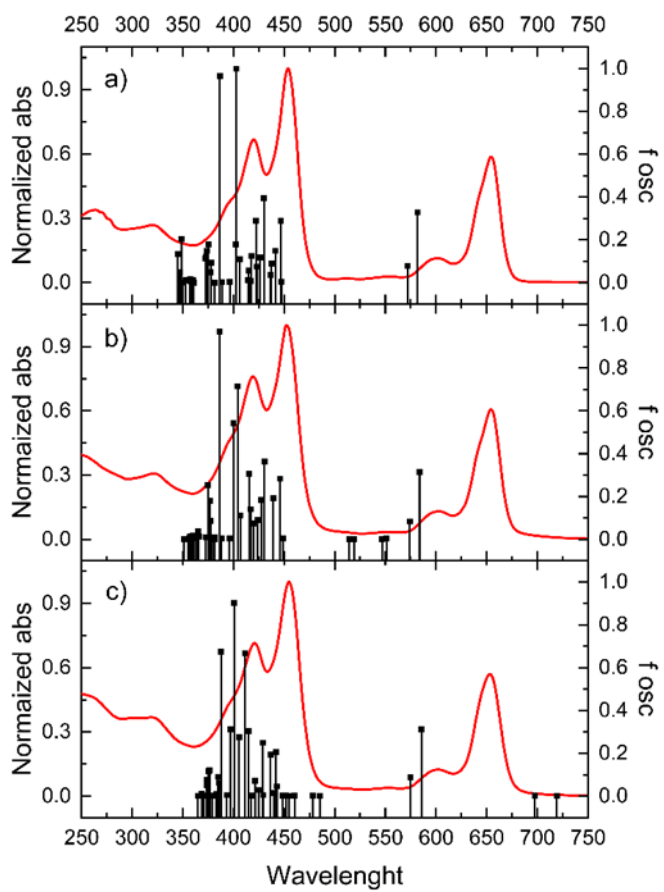

**Figure S11.** Predicted (black) and experimental (red) absorption spectra of [TPyzCAP(OAr)<sub>2</sub>].

## V. Fluorescence measurements

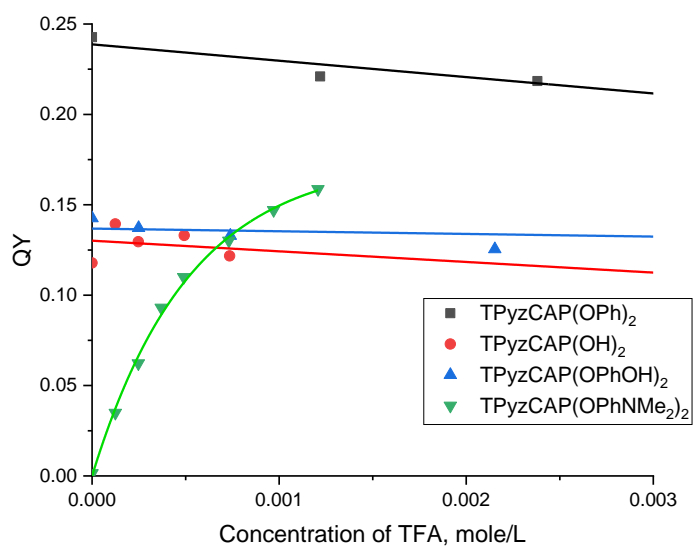

Figure S12. Dependence of fluorescence quantum yield from TFA concentration in  $\text{CH}_2\text{Cl}_2$ .

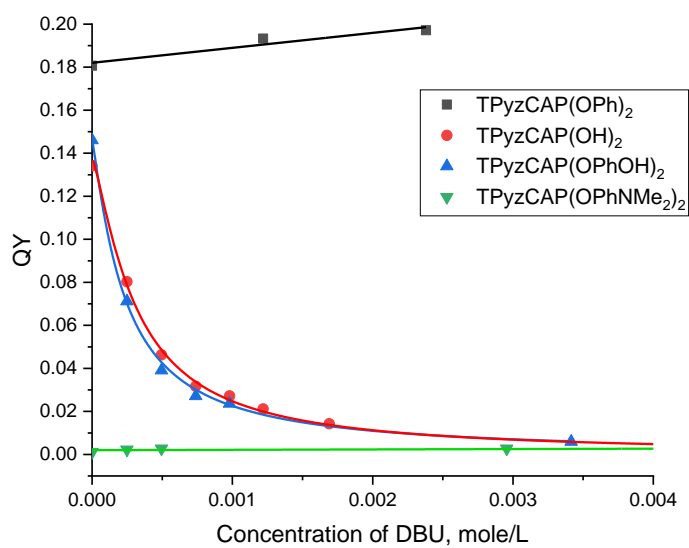

Figure S13. Dependence of fluorescence quantum yield from DBU concentration in  $\text{CH}_2\text{Cl}_2$ .

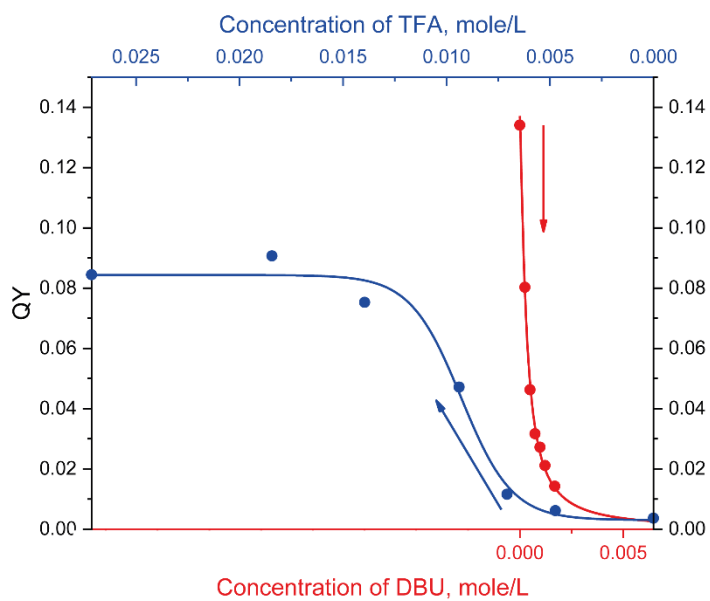

**Figure S14.** Reversible changes of [TPyzCAP(OH)<sub>2</sub>] fluorescence quantum yield during consecutive titration with DBU and TFA in CH<sub>2</sub>Cl<sub>2</sub>.

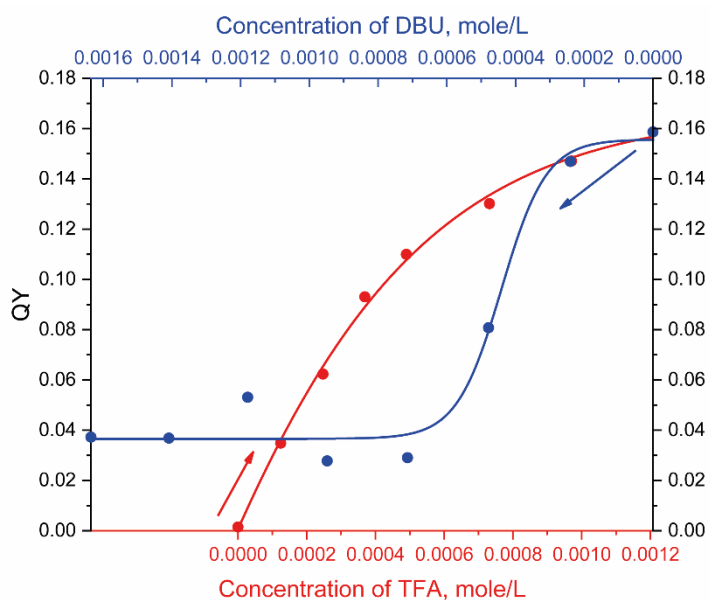

**Figure S15.** Reversible changes of [TPyzCAP(OPhNMe<sub>2</sub>)<sub>2</sub>] fluorescence quantum yield during consecutive titration with TFA and DBU in CH<sub>2</sub>Cl<sub>2</sub>.

## VI. Singlet oxygen measurements

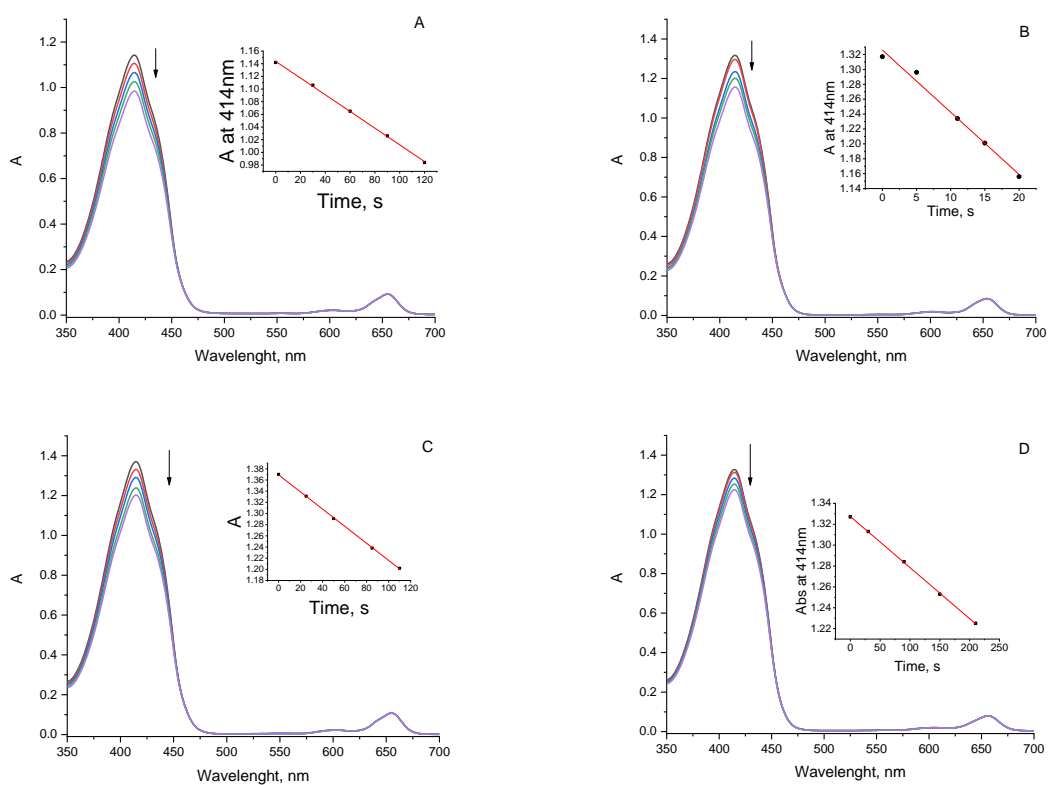

**Figure S16.** Spectral changes of DPBF solutions with photosensitizers in THF during irradiation. Photosensitizer is: A – TPyzCAP(OH)<sub>2</sub>; B – TPyzCAP(OPh)<sub>2</sub>; C – TPyzCAP(OPhOH)<sub>2</sub>; D – TPyzCAP(OPhNMe<sub>2</sub>)<sub>2</sub>
